# Supplementary material for: Consequential life cycle assessment of carbon capture and utilization technologies within the chemical industry
Source: Royal Society of Chemistry journal article supplement (doi:10.1039/c9ee00914k), 2019-01-01
Supplement: c9ee00914k1.zip [file c9ee00914k1.zip]

## Sheet: LCIA
		CO2_to_CH4		CO2_to_CO_DRM		CO2_to_CO_rWGS		CO2_to_DMC		CO2_to_DME		CO2_to_DMM		CO2_to_EtOH		CO2_to_FA_elec		CO2_to_FA_hydro		CO2_to_FT		CO2_to_MeOH		CO2_to_Polyols
Impact category	Reference unit	Near term	Long term	Near term	Long term	Near term	Long term	Near term	Long term	Near term	Long term	Near term	Long term	Near term	Long term	Near term	Long term	Near term	Long term	Near term	Long term	Near term	Long term	Near term	Long term
climate change - GWP 100a	kg CO2-Eq	-0.57081	-0.10087	-0.89757	-0.47169	-0.98297	-0.5376	-2.18055	-1.74402	-0.854545	-0.3958	-0.14054	0.32011	-0.52087	-0.08434	0.10474	0.56304	-4.01872	-3.57332	9.72535	10.1619	-1.13744	-0.67429	-3.96336	-3.52682
ecosystem quality - freshwater and terrestrial acidification	mol H+-Eq	1.08499	69.0007	62.2748	29.4667	-3.72415	8.03329	-44.3023	-52.741	-0.000415216	1.71951	0.08558	46.7673	33.5612	25.1225	0.00395	0.0041	24.0408	35.8647	44.2313	35.7926	18.1812	70.5824	-70.3046	-78.7434
ecosystem quality - freshwater ecotoxicity	CTUh.m3.yr	4.24392e-05	-0.00029	-0.00058	-0.00055	-0.0004	-0.00053	-0.00142	-0.00147	12.7316	3.15148e-05	4.31252e-05	-0.00021	0.0001	4.49823e-05	132.554	124.252	-0.00201	-0.00214	0.00404	0.00398	0.00022	-5.41716e-05	-0.0019	-0.00196
ecosystem quality - freshwater eutrophication	kg P-Eq	-6.18143e-08	5.0383e-08	-2.77814e-07	-2.35706e-07	-2.61744e-07	-1.88625e-07	2.7029e-07	3.29356e-07	0.000158135	4.25452e-09	-1.34114e-07	-3.66927e-08	9.96426e-08	1.58708e-07	-0.0004	-0.00044	-5.23186e-07	-4.50021e-07	7.90347e-07	8.49412e-07	-1.36094e-07	-3.4693e-08	-1.7283e-06	-1.66924e-06
ecosystem quality - ionising radiation	mol N-Eq	-7.65492e-09	-9.83241e-07	-1.65186e-06	-1.45764e-06	-9.73038e-07	-1.29641e-06	-6.12009e-07	-7.00818e-07	2.16329e-07	8.37257e-08	-4.60569e-07	-1.18955e-06	8.5841e-08	-2.96879e-09	-1.35627e-08	-9.50561e-08	-3.91598e-07	-7.15738e-07	5.36153e-07	4.47343e-07	1.57108e-07	-6.38292e-07	-7.08184e-07	-7.96994e-07
ecosystem quality - marine eutrophication	kg N-Eq	0.00011	-0.00052	-0.00071	-0.00056	-0.0004	-0.0006	-0.00179	-0.00183	-0.000449577	9.79757e-05	8.20692e-05	-0.00038	0.0001	5.66823e-05	0.00056	0.00063	-0.00067	-0.00086	0.00391	0.00387	0.00027	-0.00023	-0.00245	-0.00249
ecosystem quality - terrestrial eutrophication	mol N-Eq	6.44944e-09	1.40884e-07	-1.19626e-07	-2.95283e-07	-2.87941e-07	-3.26397e-07	-1.3054e-06	-1.40604e-06	-0.00202616	-1.84181e-07	1.45154e-08	8.35788e-08	1.7925e-07	7.86176e-08	0.00831	0.00832	-6.16392e-07	-6.54643e-07	1.80249e-06	1.70185e-06	1.33813e-07	2.20484e-07	-1.49752e-06	-1.59816e-06
human health - carcinogenic effects	CTUh	-0.14471	-1.25717	-7.41167	-7.95901	-4.66967	-5.46704	-0.20586	-0.88993	6.72974e-09	-1.48173	-2.52517	-3.5185	0.73566	0.05159	2.09498e-08	1.5891e-08	-4.45528	-5.25303	11.449	10.7649	-0.52559	-1.551	-3.19801	-3.88208
human health - ionising radiation	kg U235-Eq	7.01166e-09	5.68041e-09	-2.83061e-08	-3.61788e-08	-3.51973e-08	-4.01757e-08	-1.54863e-07	-1.61153e-07	0.0971856	-5.0676e-09	7.62247e-09	4.91219e-09	2.23246e-08	1.60346e-08	0.07083	0.03053	-1.52704e-07	-1.57678e-07	3.51402e-07	3.45112e-07	2.21736e-08	1.98348e-08	-2.09258e-07	-2.15548e-07
human health - non-carcinogenic effects	CTUh	0.00071	0.00041	-0.0019	-0.00164	-0.00122	-0.0012	-0.00652	-0.00639	-3.79968e-08	-0.00173	0.00062	0.00044	-0.00022	-9.59896e-05	5.38881e-07	4.43754e-07	-0.00505	-0.00504	0.01791	0.01804	-0.0005	-0.00071	-0.00972	-0.0096
human health - ozone layer depletion	kg CFC-11-Eq	0.0016	-0.00116	-0.0066	-0.00623	-0.00404	-0.00506	-0.0106	-0.01099	-5.78376e-08	-0.00361	0.00195	-0.00016	0.00212	0.00173	-9.33724e-08	-3.0105e-08	-0.01497	-0.01599	0.06218	0.06179	-0.00038	-0.00266	-0.02402	-0.02441
human health - photochemical ozone creation	kg ethylene-Eq	0.00017	4.89132e-06	-0.00062	-0.00053	-0.00038	-0.00041	-0.00122	-0.0012	-0.0015788	-0.00054	0.0002	8.87659e-05	0.00023	0.00026	0.00188	0.00213	-0.00176	-0.00178	0.00615	0.00618	-1.60163e-06	-0.00013	-0.0026	-0.00257
human health - respiratory effects, inorganics	kg PM2.5-Eq	-0.00866	-0.47285	-0.39703	-0.30355	-0.2354	-0.38866	-0.28198	-0.32343	0.000210564	0.04158	-0.07046	-0.41708	0.01397	-0.02747	0.00083	0.0008	0.01859	-0.13505	0.06127	0.01982	0.06932	-0.30896	-0.28857	-0.33002
resources - land use	kg Soil Organic Carbon	0.00074	-0.00135	-0.00591	-0.00522	-0.00311	-0.00365	-0.00422	-0.0042	-0.393778	-0.00085	0.00037	-0.00113	0.001	0.00102	1.09485	0.48784	-0.01112	-0.01166	0.04196	0.04198	6.95251e-06	-0.00165	-0.01187	-0.01185
resources - mineral, fossils and renewables	kg Sb-Eq	1.09918e-07	-7.59365e-06	-6.61836e-05	-6.31985e-05	-3.55887e-05	-3.73329e-05	-0.00017	-0.00017	-5.595e-05	-5.64137e-05	-2.05734e-06	-7.5076e-06	-1.37244e-05	-1.33254e-05	-9.52986e-05	-9.44858e-05	-9.17474e-05	-9.34986e-05	8.69752e-06	9.09653e-06	-2.28419e-05	-2.88991e-05	-0.00017	-0.00017

## Sheet: Correlation_Analysis
Near term	CO2_to_CH4 [CO2_treatment]	CO2_to_CO_DRM [CO2_treatment]	CO2_to_CO_rWGS [CO2_treatment]	CO2_to_DMC [CO2_treatment]	CO2_to_DME [CO2_treatment]	CO2_to_DMM [CO2_treatment]	CO2_to_EtOH [CO2_treatment]	CO2_to_FA_elec [CO2_treatment]	CO2_to_FA_hydro [CO2_treatment]	CO2_to_FT [CO2_treatment]	CO2_to_MeOH [CO2_treatment]	CO2_to_Polyols [CO2_treatment]	R2
ILCD 1.0.8 2016 midpoint climate change GWP 100a	-0.612532	-0.893745	-1.00485	-1.59243	-0.808772	-0.282368	-0.542755	0.10474	-4.04059	9.70047	-1.17231	-3.98636
ILCD 1.0.8 2016 midpoint ecosystem quality freshwater and terrestrial acidification	0.000223896	-0.00591489	-0.00323415	-0.00433929	-0.000812088	9.69254e-05	0.000879999	0.00395	-0.0112439	0.0418229	-0.000117065	-0.0119968	0.980015
ILCD 1.0.8 2016 midpoint ecosystem quality freshwater ecotoxicity	0.902329	62.1503	-3.86219	-44.4402	11.1516	1.20999	33.4233	132.554	23.9028	44.0566	17.9475	-70.5001	0.123873
ILCD 1.0.8 2016 midpoint ecosystem quality freshwater eutrophication	1.79377e-05	-0.000600579	-0.000419663	-0.00143969	7.25798e-05	9.58418e-06	7.99261e-05	-0.0004	-0.0020328	0.00401622	0.000201217	-0.00193773	0.930162
ILCD 1.0.8 2016 midpoint ecosystem quality ionising radiation	-1.6427e-08	-1.65879e-06	-9.80396e-07	-6.19364e-07	1.66884e-07	-4.66978e-07	7.84857e-08	-1.35627e-08	-3.98953e-07	5.27696e-07	1.49553e-07	-7.13063e-07	0.234662
ILCD 1.0.8 2016 midpoint ecosystem quality marine eutrophication	5.88144e-05	-0.000639901	-0.00042812	-0.00126523	-0.000578612	0.000126253	0.000187959	0.00056	-0.00180411	0.00610469	-4.67089e-05	-0.00265192	0.974963
ILCD 1.0.8 2016 midpoint ecosystem quality terrestrial eutrophication	0.000487824	-0.00679015	-0.00444301	-0.0110002	-0.0032903	0.00124578	0.00171402	0.00831	-0.0153757	0.0617324	-0.000790565	-0.0244946	0.973947
ILCD 1.0.8 2016 midpoint human health carcinogenic effects	4.42155e-09	-2.91391e-08	-3.64352e-08	-1.56101e-07	1.3113e-09	4.58162e-09	2.10868e-08	2.09498e-08	-1.53942e-07	3.49916e-07	2.08434e-08	-2.12619e-07	0.901084
ILCD 1.0.8 2016 midpoint human health ionising radiation	-0.0100055	-0.398123	-0.236554	-0.283134	0.0821253	-0.0715482	0.0128196	0.07083	0.0174304	0.0598389	0.0681034	-0.28949	0.110668
ILCD 1.0.8 2016 midpoint human health non-carcinogenic effects	-1.58156e-09	-1.24414e-07	-2.93477e-07	-1.31094e-06	-8.09592e-08	5.10004e-09	1.73715e-07	5.38881e-07	-6.21926e-07	1.79602e-06	1.27647e-07	-1.50829e-06	0.742386
ILCD 1.0.8 2016 midpoint human health ozone layer depletion	-1.44418e-07	-2.58581e-07	-2.65969e-07	2.66066e-07	-2.72246e-08	-1.36058e-07	9.54179e-08	-9.33724e-08	-5.2741e-07	7.85754e-07	-1.40338e-07	-1.73263e-06	0.518428
ILCD 1.0.8 2016 midpoint human health photochemical ozone creation	0.000241371	-0.00191513	-0.00133221	-0.00663269	-0.00182349	0.000433528	-0.000340334	0.00188	-0.00516948	0.0177848	-0.00061935	-0.00984947	0.931869
ILCD 1.0.8 2016 midpoint human health respiratory effects, inorganics	6.87005e-05	-0.000716103	-0.000419818	-0.00180567	0.00013714	6.11428e-05	8.39906e-05	0.00083	-0.00068191	0.00389433	0.000254874	-0.00245426	0.8279
ILCD 1.0.8 2016 midpoint resources land use	-0.369169	-7.44518	-4.74721	-0.283372	-0.802075	-2.62935	0.658242	1.09485	-4.53277	11.3602	-0.603891	-3.28616	0.729424
ILCD 1.0.8 2016 midpoint resources mineral, fossils and renewables	-5.6703e-07	-6.65215e-05	-3.60048e-05	-0.000169304	-5.71934e-05	-2.59741e-06	-1.41404e-05	-9.52986e-05	-9.21632e-05	7.96127e-06	-2.32371e-05	-0.000169212	0.287667
Long term	CO2_to_CH4 [CO2_treatment]	CO2_to_CO_DRM [CO2_treatment]	CO2_to_CO_rWGS [CO2_treatment]	CO2_to_DMC [CO2_treatment]	CO2_to_DME [CO2_treatment]	CO2_to_DMM [CO2_treatment]	CO2_to_EtOH [CO2_treatment]	CO2_to_FA_elec [CO2_treatment]	CO2_to_FA_hydro [CO2_treatment]	CO2_to_FT [CO2_treatment]	CO2_to_MeOH [CO2_treatment]	CO2_to_Polyols [CO2_treatment]	R2
ILCD 1.0.8 2016 midpoint climate change GWP 100a	-0.12082	-0.44612	-0.53771	-1.13413	-0.35046	0.20004	-0.08446	0.56304	-3.57343	10.1618	-0.68753	-3.52693
ILCD 1.0.8 2016 midpoint ecosystem quality freshwater and terrestrial acidification	-0.00175	-0.0051	-0.00365	-0.0042	-0.00067	-0.00128	0.00102	0.0041	-0.01166	0.04198	-0.00165	-0.01185	0.981562
ILCD 1.0.8 2016 midpoint ecosystem quality freshwater ecotoxicity	68.9552	29.4793	8.03256	-52.7418	2.85006	48.0289	25.1217	124.252	35.864	35.7918	70.137	-78.7441	0.0751803
ILCD 1.0.8 2016 midpoint ecosystem quality freshwater eutrophication	-0.00029	-0.00055	-0.00053	-0.00147	3.75236e-05	-0.00023	4.48715e-05	-0.00044	-0.00214	0.00398	-5.35015e-05	-0.00196	0.946297
ILCD 1.0.8 2016 midpoint ecosystem quality ionising radiation	-9.84696e-07	-1.45726e-06	-1.29644e-06	-7.00857e-07	8.53892e-08	-1.18864e-06	-3.00777e-09	-9.50561e-08	-7.15777e-07	4.47304e-07	-6.3448e-07	-7.97029e-07	0.304743
ILCD 1.0.8 2016 midpoint ecosystem quality marine eutrophication	-6.12135e-05	-0.00051	-0.00041	-0.0012	-0.00051	5.89261e-05	0.00026	0.00063	-0.00178	0.00618	-0.00013	-0.00258	0.980101
ILCD 1.0.8 2016 midpoint ecosystem quality terrestrial eutrophication	-0.00187	-0.00602	-0.00506	-0.01099	-0.00328	-0.00046	0.00172	0.00832	-0.01599	0.06179	-0.00266	-0.02441	0.97795
ILCD 1.0.8 2016 midpoint human health carcinogenic effects	4.32156e-09	-3.57806e-08	-4.01823e-08	-1.6116e-07	-3.74754e-09	3.10241e-09	1.6028e-08	1.5891e-08	-1.57685e-07	3.45106e-07	1.97132e-08	-2.15554e-07	0.899168
ILCD 1.0.8 2016 midpoint human health ionising radiation	-0.47304	-0.3035	-0.38867	-0.32343	0.04182	-0.41702	-0.02748	0.03053	-0.13505	0.01981	-0.30711	-0.33002	0.15408
ILCD 1.0.8 2016 midpoint human health non-carcinogenic effects	1.38359e-07	-2.94565e-07	-3.26426e-07	-1.40606e-06	-1.76087e-07	7.96687e-08	7.85884e-08	4.43754e-07	-6.54672e-07	1.70182e-06	2.1875e-07	-1.59818e-06	0.707177
ILCD 1.0.8 2016 midpoint human health ozone layer depletion	-2.80178e-08	-2.12269e-07	-1.88647e-07	3.29333e-07	3.60456e-08	-3.44343e-08	1.58685e-07	-3.0105e-08	-4.50043e-07	8.4939e-07	-3.49761e-08	-1.66926e-06	0.512653
ILCD 1.0.8 2016 midpoint human health photochemical ozone creation	5.63235e-05	-0.00153	-0.0012	-0.00639	-0.00158	0.00037	-9.66063e-05	0.00213	-0.00504	0.01804	-0.00072	-0.0096	0.938367
ILCD 1.0.8 2016 midpoint human health respiratory effects, inorganics	-0.00054	-0.00056	-0.0006	-0.00183	0.00011	-0.00038	5.65965e-05	0.0008	-0.00086	0.00387	-0.00023	-0.00249	0.853972
ILCD 1.0.8 2016 midpoint resources land use	-1.40456	-7.91543	-5.46746	-0.89034	-1.40911	-3.5456	0.05118	0.48784	-5.25344	10.7645	-1.55032	-3.88235	0.735034
ILCD 1.0.8 2016 midpoint resources mineral, fossils and renewables	-7.85682e-06	-6.31226e-05	-3.73351e-05	-0.00017	-5.63803e-05	-7.63391e-06	-1.33276e-05	-9.44858e-05	-9.35009e-05	9.09433e-06	-2.88434e-05	-0.00017	0.310129

## Sheet: Contribution_Analysis_near_term
climate change GWP 100a	CO2_to_CH4 [CO2_treatment]	CO2_to_CO_DRM [CO2_treatment]	CO2_to_CO_rWGS [CO2_treatment]	CO2_to_DMC [CO2_treatment]	CO2_to_DME [CO2_treatment]	CO2_to_DMM [CO2_treatment]	CO2_to_EtOH [CO2_treatment]	CO2_to_FA_elec_lp [CO2_treatment]	CO2_to_FA_hydro [CO2_treatment]	CO2_to_FT [CO2_treatment]	CO2_to_MeOH [CO2_treatment]	CO2_to_Polyols [CO2_treatment]	Rel (ABS)	CO2_to_CH4 [CO2_treatment]	CO2_to_CO_DRM [CO2_treatment]	CO2_to_CO_rWGS [CO2_treatment]	CO2_to_DMC [CO2_treatment]	CO2_to_DME [CO2_treatment]	CO2_to_DMM [CO2_treatment]	CO2_to_EtOH [CO2_treatment]	CO2_to_FA_elec [CO2_treatment]	CO2_to_FA_hydro [CO2_treatment]	CO2_to_FT [CO2_treatment]	CO2_to_MeOH [CO2_treatment]	CO2_to_Polyols [CO2_treatment]
Electricity	0.01494	1.01298	0.12957		0.06118	0.01728	0.38976	1.2249	0.0715726	0.252706	0.123113	0.00826194	Electricity	0.0109853	0.312566	0.0716672	0	0.0192161	0.00969137	0.211296	0.114015	0.0109542	0.0216944	0.0632493	0.00016517
Thermal energy	0	0	0.1882	0.87909	0.01386	0.50247	0.14586	4.16596	1.06789	10.3126	0	0.0994175	Thermal energy	0	0	0.104096	0.115661	0.00435331	0.281807	0.0790732	0.38777	0.163441	0.885318	0	0.00198752
CO2 supply	-0.79505	-0.79505	-0.79505	-0.79505	-0.79505	-0.79505	-0.79505	-0.795049	-0.795049	-0.795049	-0.795049	-0.795049	CO2 supply	0.584596	0.245321	0.439755	0.104604	0.249719	0.445898	0.43101	0.0740036	0.121682	0.0682536	0.408457	0.0158944
H2 supply	0.29279	0	0.07745		0	0.21137	0	0	0.0777006	0	0.231962	0	H2 supply	0.215287	0	0.0428388	0	0	0.118545	0	0	0.0118921	0	0.119171	0
Avoided products	-0.19121	-1.27225	-0.61134	-3.80144	-1.20122	-0.23765	-0.39864	-4.52427	-4.49215	-0.17744	-0.764334	-26.208	Avoided products	0.140596	0.392567	0.338142	0.500153	0.377294	0.133284	0.21611	0.421122	0.687525	0.0152329	0.392677	0.523941
Misc	0	0.16057	0	1.51497	0.198521	0	0.06531	0.0332003	0	0.110678	0	22.9101	Misc	0	0.0495456	0	0.199324	0.0623538	0	0.0354057	0.0030903	0	0.00950152	0	0.458012
Emissions	0.06601	0	0.00633	0.61	0.91395	0.01921	0.05	0	0.02944	0	0.03201	0	Emissions	0.0485368	0	0.00350122	0.0802573	0.287064	0.0107738	0.0271059	0	0.0045058	0	0.0164452	0
ecosystem quality freshwater and terrestrial acidification	CO2_to_CH4 [CO2_treatment]	CO2_to_CO_DRM [CO2_treatment]	CO2_to_CO_rWGS [CO2_treatment]	CO2_to_DMC [CO2_treatment]	CO2_to_DME [CO2_treatment]	CO2_to_DMM [CO2_treatment]	CO2_to_EtOH [CO2_treatment]	CO2_to_FA_elec_lp [CO2_treatment]	CO2_to_FA_hydro [CO2_treatment]	CO2_to_FT [CO2_treatment]	CO2_to_MeOH [CO2_treatment]	CO2_to_Polyols [CO2_treatment]	Rel (ABS)	CO2_to_CH4 [CO2_treatment]	CO2_to_CO_DRM [CO2_treatment]	CO2_to_CO_rWGS [CO2_treatment]	CO2_to_DMC [CO2_treatment]	CO2_to_DME [CO2_treatment]	CO2_to_DMM [CO2_treatment]	CO2_to_EtOH [CO2_treatment]	CO2_to_FA_elec [CO2_treatment]	CO2_to_FA_hydro [CO2_treatment]	CO2_to_FT [CO2_treatment]	CO2_to_MeOH [CO2_treatment]	CO2_to_Polyols [CO2_treatment]
Electricity	3.09655e-05	0.0021	0.00027		0.00013	3.5836e-05	0.00081	0.00253962	0.000148394	0.000523943	0.000255253	1.713e-05	Electricity	0.0156315	0.171429	0.0421875	0	0.0364105	0.00607819	0.242515	0.0687284	0.00689715	0.0110973	0.103782	9.45461e-05
Thermal energy	0	0	0.00079	0.00367	5.67466e-05	0.0021	0.00061	0.0174	0.00445903	0.0430608	0	0.000415124	Thermal energy	0	0	0.123438	0.210315	0.0158936	0.356184	0.182635	0.470886	0.20725	0.91204	0	0.00229121
CO2 supply	0.00033	0.00033	0.00033	0.00033	0.00033	0.00033	0.00033	0.000332987	0.000332987	0.000332987	0.000332987	0.000332987	CO2 supply	0.166585	0.0269388	0.0515625	0.0189112	0.0924267	0.0559717	0.0988024	0.00901144	0.0154768	0.00705276	0.135388	0.00183787
H2 supply	0.00074	0	0.00019		0	0.00053	0	0	0.000195285	0	0.000582993	0	H2 supply	0.373555	0	0.0296875	0	0	0.089894	0	0	0.00907658	0	0.237037	0
Avoided products	-0.00088	-0.00908	-0.00482	-0.0109	-0.00219	-0.0029	-0.00123	-0.0164967	-0.0163796	-0.00268841	-0.00128827	-0.0965861	Avoided products	0.444228	0.741224	0.753125	0.624642	0.613377	0.491873	0.368263	0.446441	0.7613	0.0569412	0.523793	0.533091
Misc	0	0.00074	0	0.00255	0.00086365	0	0.00036	0.000182262	0	0.000607598	0	0.08383	Misc	0	0.0604082	0	0.146132	0.241892	0	0.107784	0.00493245	0	0.0128691	0	0.462686
Emissions	0	0	0		0	0	0	0	0	0	0	0	Emissions	0	0	0	0	0	0	0	0	0	0	0	0
ecosystem quality freshwater ecotoxicity	CO2_to_CH4 [CO2_treatment]	CO2_to_CO_DRM [CO2_treatment]	CO2_to_CO_rWGS [CO2_treatment]	CO2_to_DMC [CO2_treatment]	CO2_to_DME [CO2_treatment]	CO2_to_DMM [CO2_treatment]	CO2_to_EtOH [CO2_treatment]	CO2_to_FA_elec_lp [CO2_treatment]	CO2_to_FA_hydro [CO2_treatment]	CO2_to_FT [CO2_treatment]	CO2_to_MeOH [CO2_treatment]	CO2_to_Polyols [CO2_treatment]	Rel (ABS)	CO2_to_CH4 [CO2_treatment]	CO2_to_CO_DRM [CO2_treatment]	CO2_to_CO_rWGS [CO2_treatment]	CO2_to_DMC [CO2_treatment]	CO2_to_DME [CO2_treatment]	CO2_to_DMM [CO2_treatment]	CO2_to_EtOH [CO2_treatment]	CO2_to_FA_elec [CO2_treatment]	CO2_to_FA_hydro [CO2_treatment]	CO2_to_FT [CO2_treatment]	CO2_to_MeOH [CO2_treatment]	CO2_to_Polyols [CO2_treatment]
Electricity	1.31755	89.3626	11.4302		5.39716	1.52478	34.3842	108.058	6.31398	22.2932	10.8607	0.72885	Electricity	0.573751	0.765469	0.412943	0	0.431491	0.346192	0.933813	0.807918	0.251576	0.482296	0.567368	0.00109563
Thermal energy	0	0	0.40413	1.88773	0.02902	1.07898	0.31321	8.9459	2.29316	22.145	0	0.213487	Thermal energy	0	0	0.0146001	0.0391518	0.00232009	0.244976	0.00850623	0.0668858	0.0913696	0.479091	0	0.00032092
CO2 supply	-0.59742	-0.59742	-0.59742	-0.59742	-0.59742	-0.59742	-0.59742	-0.597419	-0.597419	-0.597419	-0.597419	-0.597419	CO2 supply	0.260157	0.00511743	0.0215832	0.0123906	0.0477624	0.135641	0.0162249	0.00446672	0.0238038	0.0129247	0.0312093	0.000898055
H2 supply	0.2818	0	0.07454		0	0.20344	0	0	0.0747845	0	0.223257	0	H2 supply	0.122715	0	0.00269293	0	0	0.0461899	0	0	0.00297974	0	0.011663	0
Avoided products	-0.09961	-26.6986	-15.1736	-30.9425	6.4037	-0.99981	-1.10156	15.9314	15.8183	-0.467398	7.46089	-367.242	Avoided products	0.043377	0.228697	0.548181	0.641751	0.511962	0.227001	0.0299164	0.119115	0.630271	0.0101118	0.389759	0.552048
Misc	0	0.08365	0	-14.7881	-0.080859	0	0.42488	0.215976	0	0.719989	0	296.454	Misc	0	0.000716536	0	0.306707	0.0064645	0	0.011539	0.00161479	0	0.0155764	0	0.445638
Emissions	0	0	0		0	0	0	0	0	0	0	0	Emissions	0	0	0	0	0	0	0	0	0	0	0	0
ecosystem quality freshwater eutrophication	CO2_to_CH4 [CO2_treatment]	CO2_to_CO_DRM [CO2_treatment]	CO2_to_CO_rWGS [CO2_treatment]	CO2_to_DMC [CO2_treatment]	CO2_to_DME [CO2_treatment]	CO2_to_DMM [CO2_treatment]	CO2_to_EtOH [CO2_treatment]	CO2_to_FA_elec_lp [CO2_treatment]	CO2_to_FA_hydro [CO2_treatment]	CO2_to_FT [CO2_treatment]	CO2_to_MeOH [CO2_treatment]	CO2_to_Polyols [CO2_treatment]	Rel (ABS)	CO2_to_CH4 [CO2_treatment]	CO2_to_CO_DRM [CO2_treatment]	CO2_to_CO_rWGS [CO2_treatment]	CO2_to_DMC [CO2_treatment]	CO2_to_DME [CO2_treatment]	CO2_to_DMM [CO2_treatment]	CO2_to_EtOH [CO2_treatment]	CO2_to_FA_elec [CO2_treatment]	CO2_to_FA_hydro [CO2_treatment]	CO2_to_FT [CO2_treatment]	CO2_to_MeOH [CO2_treatment]	CO2_to_Polyols [CO2_treatment]
Electricity	5.61407e-06	0.00038	4.87041e-05		2.29973e-05	6.49708e-06	0.000146511	0.000460436	2.6904e-05	9.4991e-05	4.6278e-05	3.106e-06	Electricity	0.165479	0.269526	0.0696607	0	0.261863	0.0152453	0.299381	0.0999864	0.00915343	0.0220845	0.229991	0.000107026
Thermal energy	0	0	7.18506e-05	0.00034	3.38983e-06	0.00019	5.5685e-05	0.00159	0.0004077	0.00393715	0	3.7956e-05	Thermal energy	0	0	0.102767	0.157554	0.038599	0.445833	0.113787	0.345278	0.13871	0.915352	0	0.00130788
CO2 supply	1.79921e-05	1.79921e-05	1.79921e-05	1.79921e-05	1.79921e-05	1.79921e-05	1.7992e-05	1.7992e-05	1.7992e-05	1.7992e-05	1.7992e-05	1.7992e-05	CO2 supply	0.53033	0.0127614	0.0257338	0.00833743	0.204871	0.0422183	0.036765	0.00390707	0.00612134	0.00418298	0.0894159	0.000619963
H2 supply	2.32581e-06	0	6.1519e-07		0	1.67901e-06	0	0	6.17e-07	0	1.843e-06	0	H2 supply	0.0685549	0	0.000879896	0	0	0.00393978	0	0	0.000209919	0	0.00915927	0
Avoided products	-7.99426e-06	-0.00100518	-0.00056	-0.00153	3.58212e-05	-0.00021	-0.000204726	-0.00250379	-0.00248601	-0.000141869	0.000135104	-0.0154722	Avoided products	0.235636	0.712951	0.800959	0.708992	0.407885	0.492763	0.418338	0.543713	0.845805	0.0329833	0.671434	0.533137
Misc	0	6.713e-06	0	-0.00027	-7.62131e-06	0	6.4465e-05	3.2769e-05	0	0.00010924	0	0.0134898	Misc	0	0.00476139	0	0.125116	0.0867816	0	0.131728	0.00711598	0	0.0253973	0	0.464828
Emissions	0	0	0		0	0	0	0	0	0	0	0	Emissions	0	0	0	0	0	0	0	0	0	0	0	0
ecosystem quality ionising radiation	CO2_to_CH4 [CO2_treatment]	CO2_to_CO_DRM [CO2_treatment]	CO2_to_CO_rWGS [CO2_treatment]	CO2_to_DMC [CO2_treatment]	CO2_to_DME [CO2_treatment]	CO2_to_DMM [CO2_treatment]	CO2_to_EtOH [CO2_treatment]	CO2_to_FA_elec_lp [CO2_treatment]	CO2_to_FA_hydro [CO2_treatment]	CO2_to_FT [CO2_treatment]	CO2_to_MeOH [CO2_treatment]	CO2_to_Polyols [CO2_treatment]	Rel (ABS)	CO2_to_CH4 [CO2_treatment]	CO2_to_CO_DRM [CO2_treatment]	CO2_to_CO_rWGS [CO2_treatment]	CO2_to_DMC [CO2_treatment]	CO2_to_DME [CO2_treatment]	CO2_to_DMM [CO2_treatment]	CO2_to_EtOH [CO2_treatment]	CO2_to_FA_elec [CO2_treatment]	CO2_to_FA_hydro [CO2_treatment]	CO2_to_FT [CO2_treatment]	CO2_to_MeOH [CO2_treatment]	CO2_to_Polyols [CO2_treatment]
Electricity	1.37283e-09	9.3112e-08	1.19098e-08		5.62361e-09	1.58876e-09	3.58268e-08	1.13e-07	6.57889e-09	2.3e-08	1.1e-08	7.59431e-10	Electricity	0.0713942	0.0503223	0.0114827	0	0.0286587	0.00284619	0.332251	0.113814	0.0109724	0.0164286	0.0614449	7.0625e-05
Thermal energy	0	0	1.64821e-08	7.6989e-08	1.68434e-09	4.4005e-08	1.27739e-08	3.64848e-07	9.4e-08	9.03e-07	0	8.70682e-09	Thermal energy	0	0	0.0158911	0.0995536	0.00858362	0.078833	0.118463	0.367476	0.156775	0.645	0	0.00080971
CO2 supply	-1.46725e-08	-1.46725e-08	-1.46725e-08	-1.46725e-08	-1.46725e-08	-1.46725e-08	-1.46725e-08	-1.5e-08	-1.5e-08	-1.5e-08	-1.5e-08	-1.5e-08	CO2 supply	0.763045	0.00792974	0.0141464	0.0189728	0.074773	0.0262851	0.13607	0.0151081	0.0250172	0.0107143	0.0837885	0.00139496
H2 supply	2.81089e-11	0	7.43496e-12		0	2.02919e-11	0	0	7.45945e-12	0	2.2269e-11	0	H2 supply	0.00146181	0	7.16835e-06	0	0	3.6352e-05	0	0	1.2441e-05	0	0.000124392	0
Avoided products	-3.15543e-09	-1.73988e-06	-9.94121e-07	-3.78648e-07	1.71863e-07	-4.97919e-07	2.1884e-08	-4.88e-07	-4.84e-07	-4.21e-07	1.53e-07	-5.719e-06	Avoided products	0.164099	0.940316	0.958473	0.489625	0.875837	0.891999	0.202948	0.491515	0.807223	0.300714	0.854642	0.531851
Misc	0	2.6497e-09	0	-3.03033e-07	2.38376e-09	0	2.26733e-08	1.2e-08	0	3.8e-08	0	5.00954e-06	Misc	0	0.00143203	0	0.391848	0.012148	0	0.210268	0.0120864	0	0.0271429	0	0.465873
Emissions	0	0	0		0	0	0	0	0	0	0	0	Emissions	0	0	0	0	0	0	0	0	0	0	0	0
ecosystem quality marine eutrophication	CO2_to_CH4 [CO2_treatment]	CO2_to_CO_DRM [CO2_treatment]	CO2_to_CO_rWGS [CO2_treatment]	CO2_to_DMC [CO2_treatment]	CO2_to_DME [CO2_treatment]	CO2_to_DMM [CO2_treatment]	CO2_to_EtOH [CO2_treatment]	CO2_to_FA_elec_lp [CO2_treatment]	CO2_to_FA_hydro [CO2_treatment]	CO2_to_FT [CO2_treatment]	CO2_to_MeOH [CO2_treatment]	CO2_to_Polyols [CO2_treatment]	Rel (ABS)	CO2_to_CH4 [CO2_treatment]	CO2_to_CO_DRM [CO2_treatment]	CO2_to_CO_rWGS [CO2_treatment]	CO2_to_DMC [CO2_treatment]	CO2_to_DME [CO2_treatment]	CO2_to_DMM [CO2_treatment]	CO2_to_EtOH [CO2_treatment]	CO2_to_FA_elec [CO2_treatment]	CO2_to_FA_hydro [CO2_treatment]	CO2_to_FT [CO2_treatment]	CO2_to_MeOH [CO2_treatment]	CO2_to_Polyols [CO2_treatment]
Electricity	7.301e-06	0.0005	6.33389e-05		2.99076e-05	8.44934e-06	0.00019	0.000598788	3.4988e-05	0.000123534	6.0183e-05	4.039e-06	Electricity	0.0207959	0.252091	0.0663008	0	0.0398461	0.0108017	0.257455	0.105106	0.0106298	0.0186875	0.119524	9.864e-05
Thermal energy	0	0	0.00011	0.00051	7.27945e-06	0.00029	8.42162e-05	0.00241	0.000616588	0.00595438	0	5.7403e-05	Thermal energy	0	0	0.115144	0.146393	0.00969846	0.370737	0.114115	0.423029	0.187328	0.900744	0	0.00140189
CO2 supply	5.3777e-05	5.3777e-05	5.3777e-05	5.3777e-05	5.3777e-05	5.3777e-05	5.3777e-05	5.3777e-05	5.3777e-05	5.3777e-05	5.3777e-05	5.3777e-05	CO2 supply	0.153177	0.0271134	0.0562917	0.0154364	0.0716474	0.0687486	0.0728692	0.00943951	0.0163382	0.00813508	0.106802	0.00131334
H2 supply	0.00014	0	3.82111e-05		0	0.0001	0	0	3.8337e-05	0	0.000114449	0	H2 supply	0.398772	0	0.0399979	0	0	0.12784	0	0	0.0116473	0	0.227297	0
Avoided products	-0.00015	-0.00130963	-0.00069	-0.00237	-0.00052	-0.00033	-0.00028	-0.00256602	-0.0025478	-0.000250718	-0.000275112	-0.0217957	Avoided products	0.427255	0.660293	0.722266	0.680296	0.692799	0.421873	0.379407	0.450415	0.774057	0.0379272	0.546376	0.532293
Misc	0	0.00012	0	0.00055	-0.000139614	0	0.00013	6.8425e-05	0	0.000228103	0	0.0190359	Misc	0	0.0605019	0	0.157875	0.186009	0	0.176153	0.0120107	0	0.0345061	0	0.464893
Emissions	0	0	0		0	0	0	0	0	0	0	0	Emissions	0	0	0	0	0	0	0	0	0	0	0	0
ecosystem quality terrestrial eutrophication	CO2_to_CH4 [CO2_treatment]	CO2_to_CO_DRM [CO2_treatment]	CO2_to_CO_rWGS [CO2_treatment]	CO2_to_DMC [CO2_treatment]	CO2_to_DME [CO2_treatment]	CO2_to_DMM [CO2_treatment]	CO2_to_EtOH [CO2_treatment]	CO2_to_FA_elec_lp [CO2_treatment]	CO2_to_FA_hydro [CO2_treatment]	CO2_to_FT [CO2_treatment]	CO2_to_MeOH [CO2_treatment]	CO2_to_Polyols [CO2_treatment]	Rel (ABS)	CO2_to_CH4 [CO2_treatment]	CO2_to_CO_DRM [CO2_treatment]	CO2_to_CO_rWGS [CO2_treatment]	CO2_to_DMC [CO2_treatment]	CO2_to_DME [CO2_treatment]	CO2_to_DMM [CO2_treatment]	CO2_to_EtOH [CO2_treatment]	CO2_to_FA_elec [CO2_treatment]	CO2_to_FA_hydro [CO2_treatment]	CO2_to_FT [CO2_treatment]	CO2_to_MeOH [CO2_treatment]	CO2_to_Polyols [CO2_treatment]
Electricity	7.03453e-05	0.00477	0.00061		0.00029	8.14096e-05	0.00184	0.00576934	0.00033711	0.00119026	0.000579867	3.8914e-05	Electricity	0.0191659	0.24006	0.0636743	0	0.0368108	0.0102255	0.262482	0.106189	0.0111199	0.0177937	0.109144	0.00010505
Thermal energy	0	0	0.00111	0.00517	7.46713e-05	0.00295	0.00086	0.02449	0.00627813	0.0606278	0	0.000584477	Thermal energy	0	0	0.115866	0.150641	0.00947832	0.370537	0.122682	0.450757	0.20709	0.906353	0	0.00157782
CO2 supply	0.00044	0.00044	0.00044	0.00044	0.00044	0.00044	0.00044	0.000438562	0.000438562	0.000438562	0.000438562	0.000438562	CO2 supply	0.11988	0.0221439	0.045929	0.0128205	0.0558509	0.0552666	0.0627675	0.00807207	0.0144664	0.00655627	0.082547	0.00118391
H2 supply	0.00157	0	0.00041		0	0.00113	0	0	0.000416288	0	0.00124276	0	H2 supply	0.427753	0	0.0427975	0	0	0.141935	0	0	0.0137317	0	0.233915	0
Avoided products	-0.00159	-0.01333	-0.00701	-0.02266	-0.00558	-0.00336	-0.00264	-0.0230092	-0.0228458	-0.00255604	-0.00305169	-0.197429	Avoided products	0.433202	0.670861	0.731733	0.660256	0.708291	0.422036	0.376605	0.423501	0.753592	0.0382115	0.574395	0.532966
Misc	0	0.00133	0	0.00605	0.00149344	0	0.00123	0.000623763	0	0.00207941	0	0.171943	Misc	0	0.0669351	0	0.176282	0.189569	0	0.175464	0.0114808	0	0.031086	0	0.464167
Emissions	0	0	0		0	0	0	0	0	0	0	0	Emissions	0	0	0	0	0	0	0	0	0	0	0	0
human health carcinogenic effects	CO2_to_CH4 [CO2_treatment]	CO2_to_CO_DRM [CO2_treatment]	CO2_to_CO_rWGS [CO2_treatment]	CO2_to_DMC [CO2_treatment]	CO2_to_DME [CO2_treatment]	CO2_to_DMM [CO2_treatment]	CO2_to_EtOH [CO2_treatment]	CO2_to_FA_elec_lp [CO2_treatment]	CO2_to_FA_hydro [CO2_treatment]	CO2_to_FT [CO2_treatment]	CO2_to_MeOH [CO2_treatment]	CO2_to_Polyols [CO2_treatment]	Rel (ABS)	CO2_to_CH4 [CO2_treatment]	CO2_to_CO_DRM [CO2_treatment]	CO2_to_CO_rWGS [CO2_treatment]	CO2_to_DMC [CO2_treatment]	CO2_to_DME [CO2_treatment]	CO2_to_DMM [CO2_treatment]	CO2_to_EtOH [CO2_treatment]	CO2_to_FA_elec [CO2_treatment]	CO2_to_FA_hydro [CO2_treatment]	CO2_to_FT [CO2_treatment]	CO2_to_MeOH [CO2_treatment]	CO2_to_Polyols [CO2_treatment]
Electricity	9.5744e-10	6.49383e-08	8.30614e-09		3.92202e-09	1.10803e-09	2.49864e-08	7.9e-08	4.58826e-09	1.6e-08	7.89231e-09	5.29643e-10	Electricity	0.0916569	0.388141	0.116644	0	0.30218	0.0271038	0.507136	0.189298	0.0191582	0.0425851	0.378646	0.000169665
Thermal energy	0	0	6.17955e-09	2.88651e-08	3.29333e-10	1.64986e-08	4.78926e-09	1.36791e-07	3.5e-08	3.39e-07	0	3.26441e-09	Thermal energy	0	0	0.0867803	0.132981	0.0253742	0.403577	0.0972051	0.327775	0.146142	0.902271	0	0.00104572
CO2 supply	1.61564e-09	1.61564e-09	1.61564e-09	1.61564e-09	1.61564e-09	1.61564e-09	1.61564e-09	1.61564e-09	1.61564e-09	1.61564e-09	1.61564e-09	1.61564e-09	CO2 supply	0.154667	0.00965681	0.0226887	0.00744321	0.12448	0.0395206	0.0327918	0.00387137	0.00674608	0.00430015	0.077513	0.000517555
H2 supply	4.86069e-09	0	1.28568e-09		0	3.50895e-09	0	0	1.28992e-09	0	3.85084e-09	0	H2 supply	0.46532	0	0.018055	0	0	0.0858334	0	0	0.00538601	0	0.18475	0
Avoided products	-3.01214e-09	-9.82224e-08	-5.38221e-08	-1.71746e-07	-5.83388e-09	-1.81497e-08	-1.40914e-08	-1.98e-07	-1.97e-07	-1.26856e-08	7.48474e-09	-1.666e-06	Avoided products	0.288356	0.587083	0.755832	0.79123	0.449484	0.443965	0.286006	0.474443	0.822568	0.0337637	0.359092	0.533685
Misc	0	2.52938e-09	0	-1.48354e-08	1.27819e-09	0	3.78694e-09	1.925e-09	0	6.41726e-09	0	1.45028e-06	Misc	0	0.0151183	0	0.0683463	0.0984812	0	0.0768615	0.00461263	0	0.01708	0	0.464582
Emissions	0	0	0		0	0	0	0	0	0	0	0	Emissions	0	0	0	0	0	0	0	0	0	0	0	0
human health ionising radiation	CO2_to_CH4 [CO2_treatment]	CO2_to_CO_DRM [CO2_treatment]	CO2_to_CO_rWGS [CO2_treatment]	CO2_to_DMC [CO2_treatment]	CO2_to_DME [CO2_treatment]	CO2_to_DMM [CO2_treatment]	CO2_to_EtOH [CO2_treatment]	CO2_to_FA_elec_lp [CO2_treatment]	CO2_to_FA_hydro [CO2_treatment]	CO2_to_FT [CO2_treatment]	CO2_to_MeOH [CO2_treatment]	CO2_to_Polyols [CO2_treatment]	Rel (ABS)	CO2_to_CH4 [CO2_treatment]	CO2_to_CO_DRM [CO2_treatment]	CO2_to_CO_rWGS [CO2_treatment]	CO2_to_DMC [CO2_treatment]	CO2_to_DME [CO2_treatment]	CO2_to_DMM [CO2_treatment]	CO2_to_EtOH [CO2_treatment]	CO2_to_FA_elec [CO2_treatment]	CO2_to_FA_hydro [CO2_treatment]	CO2_to_FT [CO2_treatment]	CO2_to_MeOH [CO2_treatment]	CO2_to_Polyols [CO2_treatment]
Electricity	0.00021	0.014	0.00179		0.00085	0.00024	0.00539	0.0169251	0.000988956	0.00349177	0.00170111	0.00011416	Electricity	0.0201536	0.0327994	0.00732248	0	0.00835912	0.00287194	0.166461	0.187246	0.0267339	0.0178474	0.0194024	2.62393e-05
Thermal energy	0	0	0.00216	0.01009	0.00026	0.00577	0.00167	0.04781	0.0122558	0.118354	0	0.00114098	Thermal energy	0	0	0.00883607	0.0332663	0.00255691	0.0690462	0.051575	0.528932	0.331305	0.604942	0	0.000262252
CO2 supply	-0.00978	-0.00978	-0.00978	-0.00978	-0.00978	-0.00978	-0.00978	-0.00977839	-0.00977839	-0.00977839	-0.00977839	-0.00977839	CO2 supply	0.938583	0.0229127	0.0400078	0.0322442	0.0961791	0.117032	0.302038	0.10818	0.264334	0.0499801	0.111529	0.00224753
H2 supply	-9.96678e-06	0	-2.63627e-06		0	-7.19505e-06	0	0	-2.645e-06	0	-7.896e-06	0	H2 supply	0.000956508	0	1.07844e-05	0	0	8.6099e-05	0	0	7.15008e-05	0	9.00593e-05	0
Avoided products	-0.00042	-0.402697	-0.23072	-0.13243	0.09066	-0.06777	0.01198	0.0140666	0.0139668	-0.0579887	0.0761881	-2.31045	Avoided products	0.0403072	0.943444	0.943823	0.436616	0.891574	0.810964	0.369981	0.155622	0.377556	0.296397	0.868978	0.531049
Misc	0	0.00036	0	-0.15101	0.000135291	0	0.00356	0.00180957	0	0.00603248	0	2.02924	Misc	0	0.000843414	0	0.497873	0.00133049	0	0.109944	0.0200197	0	0.0308337	0	0.466415
Emissions	0	0	0		0	0	0	0	0	0	0	0	Emissions	0	0	0	0	0	0	0	0	0	0	0	0
human health non-carcinogenic effects	CO2_to_CH4 [CO2_treatment]	CO2_to_CO_DRM [CO2_treatment]	CO2_to_CO_rWGS [CO2_treatment]	CO2_to_DMC [CO2_treatment]	CO2_to_DME [CO2_treatment]	CO2_to_DMM [CO2_treatment]	CO2_to_EtOH [CO2_treatment]	CO2_to_FA_elec_lp [CO2_treatment]	CO2_to_FA_hydro [CO2_treatment]	CO2_to_FT [CO2_treatment]	CO2_to_MeOH [CO2_treatment]	CO2_to_Polyols [CO2_treatment]	Rel (ABS)	CO2_to_CH4 [CO2_treatment]	CO2_to_CO_DRM [CO2_treatment]	CO2_to_CO_rWGS [CO2_treatment]	CO2_to_DMC [CO2_treatment]	CO2_to_DME [CO2_treatment]	CO2_to_DMM [CO2_treatment]	CO2_to_EtOH [CO2_treatment]	CO2_to_FA_elec [CO2_treatment]	CO2_to_FA_hydro [CO2_treatment]	CO2_to_FT [CO2_treatment]	CO2_to_MeOH [CO2_treatment]	CO2_to_Polyols [CO2_treatment]
Electricity	8.47815e-09	5.75029e-07	7.3551e-08		3.47296e-08	9.81164e-09	2.21255e-07	6.95e-07	4.1e-08	1.43e-07	7e-08	4.69e-09	Electricity	0.355185	0.447908	0.146157	0	0.225548	0.0539435	0.631616	0.312406	0.0389411	0.0751468	0.491997	0.000217514
Thermal energy	0	0	3.06222e-08	1.43039e-07	1.78003e-09	8.17574e-08	2.37328e-08	6.77855e-07	1.74e-07	1.678e-06	0	1.6e-08	Thermal energy	0	0	0.060851	0.0895664	0.0115602	0.449495	0.06775	0.304699	0.165262	0.881792	0	0.000742052
CO2 supply	-7.16535e-09	-7.16535e-09	-7.16535e-09	-7.16535e-09	-7.16535e-09	-7.16535e-09	-7.16535e-09	-7.16535e-09	-7.16534e-09	-7.16534e-09	-7.16534e-09	-7.16534e-09	CO2 supply	0.300186	0.00558132	0.0142386	0.00448671	0.0465346	0.0393944	0.0204549	0.00322086	0.00680552	0.0037654	0.0503618	0.000332316
H2 supply	2.66591e-09	0	7.05149e-10		0	1.92453e-09	0	0	7.07472e-10	0	2.11204e-09	0	H2 supply	0.111686	0	0.00140124	0	0	0.0105809	0	0	0.000671944	0	0.0148445	0
Avoided products	-5.56027e-09	-6.96946e-07	-3.91189e-07	-1.32231e-06	-7.30873e-08	-8.12284e-08	-8.11267e-08	-8.36e-07	-8.3e-07	-4.57768e-08	6.3e-08	-1.1526e-05	Avoided products	0.232943	0.542874	0.777352	0.827988	0.474658	0.446586	0.231592	0.375786	0.788319	0.0240558	0.442797	0.534556
Misc	0	4.66912e-09	0	-1.24502e-07	-3.72166e-08	0	1.70198e-08	8.65158e-09	0	2.9e-08	0	1.0008e-05	Misc	0	0.00363692	0	0.0779591	0.241699	0	0.0485864	0.00388892	0	0.0152396	0	0.464152
Emissions	0	0	0		0	0	0	0	0	0	0	0	Emissions	0	0	0	0	0	0	0	0	0	0	0	0
human health ozone layer depletion	CO2_to_CH4 [CO2_treatment]	CO2_to_CO_DRM [CO2_treatment]	CO2_to_CO_rWGS [CO2_treatment]	CO2_to_DMC [CO2_treatment]	CO2_to_DME [CO2_treatment]	CO2_to_DMM [CO2_treatment]	CO2_to_EtOH [CO2_treatment]	CO2_to_FA_elec_lp [CO2_treatment]	CO2_to_FA_hydro [CO2_treatment]	CO2_to_FT [CO2_treatment]	CO2_to_MeOH [CO2_treatment]	CO2_to_Polyols [CO2_treatment]	Rel (ABS)	CO2_to_CH4 [CO2_treatment]	CO2_to_CO_DRM [CO2_treatment]	CO2_to_CO_rWGS [CO2_treatment]	CO2_to_DMC [CO2_treatment]	CO2_to_DME [CO2_treatment]	CO2_to_DMM [CO2_treatment]	CO2_to_EtOH [CO2_treatment]	CO2_to_FA_elec [CO2_treatment]	CO2_to_FA_hydro [CO2_treatment]	CO2_to_FT [CO2_treatment]	CO2_to_MeOH [CO2_treatment]	CO2_to_Polyols [CO2_treatment]
Electricity	2.18812e-09	1.48409e-07	1.89828e-08		8.96335e-09	2.53228e-09	5.71036e-08	1.79e-07	1e-08	3.7e-08	1.8e-08	1.21044e-09	Electricity	0.0106869	0.164087	0.0484369	0	0.0188008	0.00895638	0.469532	0.145548	0.0127224	0.0324561	0.0775728	4.53252e-05
Thermal energy	0	0	1.60469e-08	7.49561e-08	1.19433e-09	4.28431e-08	1.24366e-08	3.55214e-07	9.1e-08	8.79e-07	0	8.47692e-09	Thermal energy	0	0	0.0409456	0.110492	0.00250512	0.151531	0.102259	0.288831	0.115774	0.771053	0	0.00031742
CO2 supply	2.79268e-08	2.79268e-08	2.79268e-08	2.79268e-08	2.79268e-08	2.79268e-08	2.79268e-08	2.8e-08	2.8e-08	2.8e-08	2.8e-08	2.8e-08	CO2 supply	0.136396	0.030877	0.0712586	0.0411667	0.0585769	0.0987739	0.229627	0.0227673	0.0356228	0.0245614	0.120669	0.00104847
H2 supply	5.06315e-11	0	1.33923e-11		0	3.6551e-11	0	0	1.34365e-11	0	4.01123e-11	0	H2 supply	0.000247286	0	3.41721e-05	0	0	0.000129277	0	0	1.70944e-05	0	0.000172868	0
Avoided products	-1.74583e-07	-5.81517e-07	-3.28938e-07	-2.06159e-07	-2.51988e-07	-2.09396e-07	-1.31001e-08	-6.62e-07	-6.57e-07	-1.77e-07	-1.86e-07	-1.4219e-05	Avoided products	0.85267	0.642947	0.839325	0.303897	0.528549	0.740609	0.107715	0.538285	0.835864	0.155263	0.801586	0.532433
Misc	0	1.46602e-07	0	3.69342e-07	1.86682e-07	0	1.10511e-08	5.61754e-09	0	1.9e-08	0	1.2449e-05	Misc	0	0.162089	0	0.544444	0.391569	0	0.0908672	0.00456773	0	0.0166667	0	0.466156
Emissions	0	0	0		0	0	0	0	0	0	0	0	Emissions	0	0	0	0	0	0	0	0	0	0	0	0
human health photochemical ozone creation	CO2_to_CH4 [CO2_treatment]	CO2_to_CO_DRM [CO2_treatment]	CO2_to_CO_rWGS [CO2_treatment]	CO2_to_DMC [CO2_treatment]	CO2_to_DME [CO2_treatment]	CO2_to_DMM [CO2_treatment]	CO2_to_EtOH [CO2_treatment]	CO2_to_FA_elec_lp [CO2_treatment]	CO2_to_FA_hydro [CO2_treatment]	CO2_to_FT [CO2_treatment]	CO2_to_MeOH [CO2_treatment]	CO2_to_Polyols [CO2_treatment]	Rel (ABS)	CO2_to_CH4 [CO2_treatment]	CO2_to_CO_DRM [CO2_treatment]	CO2_to_CO_rWGS [CO2_treatment]	CO2_to_DMC [CO2_treatment]	CO2_to_DME [CO2_treatment]	CO2_to_DMM [CO2_treatment]	CO2_to_EtOH [CO2_treatment]	CO2_to_FA_elec [CO2_treatment]	CO2_to_FA_hydro [CO2_treatment]	CO2_to_FT [CO2_treatment]	CO2_to_MeOH [CO2_treatment]	CO2_to_Polyols [CO2_treatment]
Electricity	2.4031e-05	0.00163	0.00021		9.84397e-05	2.78107e-05	0.00063	0.00197089	0.000115162	0.000406609	0.000198091	1.3294e-05	Electricity	0.0133207	0.236805	0.0650155	0	0.0241305	0.00959714	0.196262	0.115673	0.0116652	0.0205483	0.0739742	8.63892e-05
Thermal energy	0	0	0.00032	0.0015	2.33257e-05	0.00086	0.00025	0.00711	0.00182136	0.0175889	0	0.000169564	Thermal energy	0	0	0.0990712	0.0904704	0.00571783	0.296776	0.0778816	0.417292	0.184493	0.888869	0	0.00110189
CO2 supply	0.00021	0.00021	0.00021	0.00021	0.00021	0.00021	0.00021	0.000205168	0.000205168	0.000205168	0.000205168	0.000205168	CO2 supply	0.116406	0.0305086	0.0650155	0.0126659	0.0514773	0.0724685	0.0654206	0.0120415	0.0207823	0.0103683	0.076617	0.00133325
H2 supply	0.00079	0	0.00021		0	0.00057	0	0	0.000209693	0	0.000626003	0	H2 supply	0.437908	0	0.0650155	0	0	0.1967	0	0	0.0212407	0	0.233772	0
Avoided products	-0.00078	-0.00439331	-0.00228	-0.0116	-0.00295	-0.00123	-0.00177	-0.00757463	-0.00752085	-0.000994821	-0.00164858	-0.0818626	Avoided products	0.432365	0.638255	0.705882	0.699638	0.723133	0.424458	0.551402	0.444562	0.761818	0.0502742	0.615637	0.531973
Misc	0	0.00065	0	0.00327	0.000797705	0	0.00035	0.000177721	0	0.000592459	0	0.0716344	Misc	0	0.0944313	0	0.197226	0.195541	0	0.109034	0.0104306	0	0.0299404	0	0.465506
Emissions	0	0	0		0	0	0	0	0	0	0	0	Emissions	0	0	0	0	0	0	0	0	0	0	0	0
human health respiratory effects, inorganics	CO2_to_CH4 [CO2_treatment]	CO2_to_CO_DRM [CO2_treatment]	CO2_to_CO_rWGS [CO2_treatment]	CO2_to_DMC [CO2_treatment]	CO2_to_DME [CO2_treatment]	CO2_to_DMM [CO2_treatment]	CO2_to_EtOH [CO2_treatment]	CO2_to_FA_elec_lp [CO2_treatment]	CO2_to_FA_hydro [CO2_treatment]	CO2_to_FT [CO2_treatment]	CO2_to_MeOH [CO2_treatment]	CO2_to_Polyols [CO2_treatment]	Rel (ABS)	CO2_to_CH4 [CO2_treatment]	CO2_to_CO_DRM [CO2_treatment]	CO2_to_CO_rWGS [CO2_treatment]	CO2_to_DMC [CO2_treatment]	CO2_to_DME [CO2_treatment]	CO2_to_DMM [CO2_treatment]	CO2_to_EtOH [CO2_treatment]	CO2_to_FA_elec [CO2_treatment]	CO2_to_FA_hydro [CO2_treatment]	CO2_to_FT [CO2_treatment]	CO2_to_MeOH [CO2_treatment]	CO2_to_Polyols [CO2_treatment]
Electricity	4.50388e-06	0.00031	3.90728e-05		1.84495e-05	5.21227e-06	0.000117538	0.000369383	2.1584e-05	7.6207e-05	3.7126e-05	2.491e-06	Electricity	0.0277212	0.21319	0.0531038	0	0.13453	0.0103935	0.290903	0.116975	0.0132872	0.0178402	0.145663	6.63967e-05
Thermal energy	0	0	7.12168e-05	0.00033	7.16543e-06	0.00019	5.5194e-05	0.00158	0.000404103	0.00390242	0	3.7621e-05	Thermal energy	0	0	0.0967907	0.131374	0.052249	0.378868	0.136603	0.500348	0.248767	0.913566	0	0.00100277
CO2 supply	2.19034e-05	2.19034e-05	2.19034e-05	2.19034e-05	2.19034e-05	2.19034e-05	2.1903e-05	2.1903e-05	2.1903e-05	2.1903e-05	2.1903e-05	2.1903e-05	CO2 supply	0.134815	0.0150632	0.0297689	0.00871984	0.159716	0.0436763	0.0542092	0.00693615	0.0134836	0.00512754	0.0859359	0.000583816
H2 supply	8.91789e-05	0	2.35884e-05		0	6.43785e-05	0	0	2.3666e-05	0	7.0651e-05	0	H2 supply	0.548893	0	0.032059	0	0	0.128373	0	0	0.0145689	0	0.277198	0
Avoided products	-4.68842e-05	-0.00108283	-0.00058	-0.00191	4.57085e-05	-0.00022	-0.000160028	-0.00116141	-0.00115317	-0.000187421	0.000125196	-0.0199916	Avoided products	0.288571	0.744672	0.788278	0.76038	0.333298	0.438689	0.396064	0.367792	0.709893	0.0438757	0.491204	0.532868
Misc	0	3.93699e-05	0	-0.00025	4.39132e-05	0	4.9383e-05	2.5103e-05	0	8.3684e-05	0	0.0174634	Misc	0	0.0270751	0	0.0995261	0.320207	0	0.122221	0.00794952	0	0.0195906	0	0.465479
Emissions	0	0	0		0	0	0	0	0	0	0	0	Emissions	0	0	0	0	0	0	0	0	0	0	0	0
resources land use	CO2_to_CH4 [CO2_treatment]	CO2_to_CO_DRM [CO2_treatment]	CO2_to_CO_rWGS [CO2_treatment]	CO2_to_DMC [CO2_treatment]	CO2_to_DME [CO2_treatment]	CO2_to_DMM [CO2_treatment]	CO2_to_EtOH [CO2_treatment]	CO2_to_FA_elec_lp [CO2_treatment]	CO2_to_FA_hydro [CO2_treatment]	CO2_to_FT [CO2_treatment]	CO2_to_MeOH [CO2_treatment]	CO2_to_Polyols [CO2_treatment]	Rel (ABS)	CO2_to_CH4 [CO2_treatment]	CO2_to_CO_DRM [CO2_treatment]	CO2_to_CO_rWGS [CO2_treatment]	CO2_to_DMC [CO2_treatment]	CO2_to_DME [CO2_treatment]	CO2_to_DMM [CO2_treatment]	CO2_to_EtOH [CO2_treatment]	CO2_to_FA_elec [CO2_treatment]	CO2_to_FA_hydro [CO2_treatment]	CO2_to_FT [CO2_treatment]	CO2_to_MeOH [CO2_treatment]	CO2_to_Polyols [CO2_treatment]
Electricity	0.01991	1.35014	0.17269		0.08154	0.02304	0.519495	1.6326	0.0953951	0.336818	0.16409	0.0110119	Electricity	0.0482094	0.126237	0.0309413	0	0.0516671	0.00578855	0.42248	0.123642	0.0127335	0.0200231	0.175445	0.000237513
Thermal energy	0	0	0.24382	1.13892	0.01669	0.65098	0.188968	5.3973	1.38352	13.3607	0	0.128802	Thermal energy	0	0	0.0436858	0.212502	0.0105755	0.163552	0.153678	0.408753	0.184676	0.794265	0	0.00277812
CO2 supply	-0.06367	-0.06367	-0.06367	-0.06367	-0.06367	-0.06367	-0.0636694	-0.0636694	-0.0636693	-0.0636694	-0.0636694	-0.0636694	CO2 supply	0.154168	0.00595309	0.0114079	0.0118797	0.0403439	0.0159964	0.0517791	0.00482186	0.00849871	0.00378502	0.0680753	0.00137327
H2 supply	0.00201	0	0.00053		0	0.00145	0	0	0.000532882	0	0.00159083	0	H2 supply	0.00486695	0	9.49613e-05	0	0	0.000364297	0	0	7.11302e-05	0	0.00170092	0
Avoided products	-0.3274	-9.00654	-5.10051	-2.75778	-1.12648	-3.24113	-0.222051	-5.99106	-5.94852	-2.66128	-0.705928	-24.7556	Avoided products	0.792755	0.842104	0.91387	0.514552	0.713784	0.814299	0.180583	0.45372	0.794021	0.158208	0.754779	1
Misc	0	0.27493	0	1.39921	0.2898	0	0.23545	0.119685	0	0.398988	0	21.4041	Misc	0	0.0257057	0	0.261067	0.183629	0	0.19148	0.00906408	0	0.023719	0	0.461662
Emissions	0	0	0		0	0	0	0	0	0	0	0	Emissions	0	0	0	0	0	0	0	0	0	0	0	0
resources mineral, fossils and renewables	CO2_to_CH4 [CO2_treatment]	CO2_to_CO_DRM [CO2_treatment]	CO2_to_CO_rWGS [CO2_treatment]	CO2_to_DMC [CO2_treatment]	CO2_to_DME [CO2_treatment]	CO2_to_DMM [CO2_treatment]	CO2_to_EtOH [CO2_treatment]	CO2_to_FA_elec_lp [CO2_treatment]	CO2_to_FA_hydro [CO2_treatment]	CO2_to_FT [CO2_treatment]	CO2_to_MeOH [CO2_treatment]	CO2_to_Polyols [CO2_treatment]	Rel (ABS)	CO2_to_CH4 [CO2_treatment]	CO2_to_CO_DRM [CO2_treatment]	CO2_to_CO_rWGS [CO2_treatment]	CO2_to_DMC [CO2_treatment]	CO2_to_DME [CO2_treatment]	CO2_to_DMM [CO2_treatment]	CO2_to_EtOH [CO2_treatment]	CO2_to_FA_elec [CO2_treatment]	CO2_to_FA_hydro [CO2_treatment]	CO2_to_FT [CO2_treatment]	CO2_to_MeOH [CO2_treatment]	CO2_to_Polyols [CO2_treatment]
Electricity	-7.58588e-08	-5.14512e-06	-6.58103e-07		-3.10745e-07	-8.77903e-08	-1.97969e-06	-6.222e-06	-3.64e-07	-1.284e-06	-6.25e-07	-4.2e-08	Electricity	0.101513	0.0760926	0.0180434	0	0.00535005	0.0240459	0.115945	0.05977	0.00386448	0.088895	0.026706	1.47482e-05
Thermal energy	0	0	1.66742e-07	7.78861e-07	1.10922e-08	4.45179e-07	1.29227e-07	3.69101e-06	9.46e-07	9.137e-06	0	8.8e-08	Thermal energy	0	0	0.00457162	0.00293001	0.000190973	0.121935	0.00756847	0.0354567	0.0100434	0.632581	0	3.0901e-05
CO2 supply	5.94447e-08	5.94447e-08	5.94448e-08	5.94443e-08	5.9444e-08	5.94445e-08	5.94449e-08	5.9e-08	5.9e-08	5.9e-08	5.9e-08	5.9e-08	CO2 supply	0.0795482	0.000879144	0.00162982	0.000223624	0.00102344	0.0162819	0.00348152	0.000566768	0.000626386	0.00408474	0.00252104	2.07177e-05
H2 supply	3.06815e-08	0	8.11545e-09		0	2.21491e-08	0	0	8.14219e-09	0	2.4e-08	0	H2 supply	0.0410576	0	0.000222504	0	0	0.00606666	0	0	8.64433e-05	0	0.00102551	0
Avoided products	-5.81294e-07	-6.19239e-05	-3.55809e-05	-0.00022	-5.73271e-05	-3.03639e-06	-1.36277e-05	-9.3477e-05	-9.2814e-05	-1.798e-06	-2.2695e-05	-0.00150821	Avoided products	0.777881	0.915809	0.975533	0.82762	0.986992	0.831671	0.798137	0.897962	0.985379	0.124481	0.969747	0.529605
Misc	0	4.88128e-07	0	4.49841e-05	3.74238e-07	0	1.27833e-06	6.5e-07	0	2.166e-06	0	0.0013394	Misc	0	0.00721906	0	0.169226	0.0064432	0	0.0748683	0.00624406	0	0.149958	0	0.470328
Emissions	0	0	0		0	0	0	0	0	0	0	0	Emissions	0	0	0	0	0	0	0	0	0	0	0	0

## Sheet: Contribution_Analysis_long_term
climate change GWP 100a	CO2_to_CH4 [CO2_treatment]	CO2_to_CO_DRM [CO2_treatment]	CO2_to_CO_rWGS [CO2_treatment]	CO2_to_DMC [CO2_treatment]	CO2_to_DME [CO2_treatment]	CO2_to_DMM [CO2_treatment]	CO2_to_EtOH [CO2_treatment]	CO2_to_FA_elec_lp [CO2_treatment]	CO2_to_FA_hydro [CO2_treatment]	CO2_to_FT [CO2_treatment]	CO2_to_MeOH [CO2_treatment]	CO2_to_Polyols [CO2_treatment]	Rel (ABS)	CO2_to_CH4 [CO2_treatment]	CO2_to_CO_DRM [CO2_treatment]	CO2_to_CO_rWGS [CO2_treatment]	CO2_to_DMC [CO2_treatment]	CO2_to_DME [CO2_treatment]	CO2_to_DMM [CO2_treatment]	CO2_to_EtOH [CO2_treatment]	CO2_to_FA_elec [CO2_treatment]	CO2_to_FA_hydro [CO2_treatment]	CO2_to_FT [CO2_treatment]	CO2_to_MeOH [CO2_treatment]	CO2_to_Polyols [CO2_treatment]
Electricity	0.01494	1.01298	0.12957	0	0.06118	0.01728	0.38976	1.2249	0.0715726	0.252706	0.123113	0.00826194	Electricity	0.0159767	0.362658	0.0953794	0	0.0224474	0.012811	0.281147	0.119095	0.0117634	0.0225829	0.0812821	0.000166697
Thermal energy	0	0	0.1882	0.87909	0.01386	0.50247	0.14586	4.16596	1.06789	10.3126	0	0.0994175	Thermal energy	0	0	0.138538	0.123083	0.00508534	0.37252	0.105214	0.405049	0.175513	0.921576	0	0.0020059
CO2 supply	-0.33675	-0.33675	-0.33675	-0.33675	-0.33675	-0.33675	-0.33675	-0.33675	-0.33675	-0.33675	-0.33675	-0.33675	CO2 supply	0.360118	0.12056	0.247889	0.047149	0.123556	0.249659	0.242909	0.0327416	0.0553467	0.0300934	0.222331	0.00679445
H2 supply	0.3262	0	0.08628	0	0	0.23548	0	0	0.08657	0	0.25843	0	H2 supply	0.348836	0	0.0635126	0	0	0.17458	0	0	0.0142283	0	0.170622	0
Avoided products	-0.19121	-1.28291	-0.61134	-3.80144	-1.20122	-0.23765	-0.39864	-4.52427	-4.49215	-0.17744	-0.764334	-26.208	Avoided products	0.204479	0.459296	0.450021	0.532247	0.440737	0.176188	0.287553	0.439887	0.73831	0.0158568	0.504632	0.528786
Misc	0	0.16057	0	1.51497	0.198521	0	0.06531	0.0332003	0	0.110678	0	22.9101	Misc	0	0.0574858	0	0.212114	0.0728389	0	0.0471103	0.003228	0	0.00989066	0	0.462247
Emissions	0.06601	0	0.00633	0.61	0.91395	0.01921	0.05	0	0.02944	0	0.03201	0	Emissions	0.0705906	0	0.00465965	0.0854073	0.335335	0.0142419	0.0360667	0	0.00483863	0	0.0211338	0
ecosystem quality freshwater and terrestrial acidification	CO2_to_CH4 [CO2_treatment]	CO2_to_CO_DRM [CO2_treatment]	CO2_to_CO_rWGS [CO2_treatment]	CO2_to_DMC [CO2_treatment]	CO2_to_DME [CO2_treatment]	CO2_to_DMM [CO2_treatment]	CO2_to_EtOH [CO2_treatment]	CO2_to_FA_elec_lp [CO2_treatment]	CO2_to_FA_hydro [CO2_treatment]	CO2_to_FT [CO2_treatment]	CO2_to_MeOH [CO2_treatment]	CO2_to_Polyols [CO2_treatment]	Rel (ABS)	CO2_to_CH4 [CO2_treatment]	CO2_to_CO_DRM [CO2_treatment]	CO2_to_CO_rWGS [CO2_treatment]	CO2_to_DMC [CO2_treatment]	CO2_to_DME [CO2_treatment]	CO2_to_DMM [CO2_treatment]	CO2_to_EtOH [CO2_treatment]	CO2_to_FA_elec [CO2_treatment]	CO2_to_FA_hydro [CO2_treatment]	CO2_to_FT [CO2_treatment]	CO2_to_MeOH [CO2_treatment]	CO2_to_Polyols [CO2_treatment]
Electricity	3.09655e-05	0.0021	0.00027	0	0.00013	3.5836e-05	0.00081	0.00253962	0.000148394	0.000523943	0.000255253	1.713e-05	Electricity	0.011175	0.179028	0.0401786	0	0.0349425	0.00550829	0.232092	0.068456	0.00679553	0.0110628	0.0819821	9.44695e-05
Thermal energy	0	0	0.00079	0.00367	5.67466e-05	0.0021	0.00061	0.0174	0.00445903	0.0430608	0	0.000415124	Thermal energy	0	0	0.11756	0.208523	0.0152528	0.322787	0.174785	0.46902	0.204196	0.909209	0	0.00228935
CO2 supply	0.00048	0.00048	0.00048	0.00048	0.00048	0.00048	0.00048	0.00048	0.00048	0.00048	0.00048	0.00048	CO2 supply	0.173225	0.0409207	0.0714286	0.0272727	0.129019	0.0737799	0.137536	0.0129385	0.021981	0.010135	0.154166	0.00264713
H2 supply	-0.00138	0	-0.00036	0	0	-0.00099	0	0	-0.00037	0	-0.00109	0	H2 supply	0.498021	0	0.0535714	0	0	0.152171	0	0	0.0169437	0	0.350086	0
Avoided products	-0.00088	-0.00841	-0.00482	-0.0109	-0.00219	-0.0029	-0.00123	-0.0164967	-0.0163796	-0.00268841	-0.00128827	-0.0965861	Avoided products	0.317579	0.716965	0.717262	0.619318	0.588647	0.445754	0.352436	0.444672	0.750084	0.0567645	0.413766	0.532658
Misc	0	0.00074	0	0.00255	0.00086365	0	0.00036	0.000182262	0	0.000607598	0	0.08383	Misc	0	0.0630861	0	0.144886	0.232139	0	0.103152	0.00491291	0	0.0128292	0	0.462311
Emissions	0	0	0	0	0	0	0	0	0	0	0	0	Emissions	0	0	0	0	0	0	0	0	0	0	0	0
ecosystem quality freshwater ecotoxicity	CO2_to_CH4 [CO2_treatment]	CO2_to_CO_DRM [CO2_treatment]	CO2_to_CO_rWGS [CO2_treatment]	CO2_to_DMC [CO2_treatment]	CO2_to_DME [CO2_treatment]	CO2_to_DMM [CO2_treatment]	CO2_to_EtOH [CO2_treatment]	CO2_to_FA_elec_lp [CO2_treatment]	CO2_to_FA_hydro [CO2_treatment]	CO2_to_FT [CO2_treatment]	CO2_to_MeOH [CO2_treatment]	CO2_to_Polyols [CO2_treatment]	Rel (ABS)	CO2_to_CH4 [CO2_treatment]	CO2_to_CO_DRM [CO2_treatment]	CO2_to_CO_rWGS [CO2_treatment]	CO2_to_DMC [CO2_treatment]	CO2_to_DME [CO2_treatment]	CO2_to_DMM [CO2_treatment]	CO2_to_EtOH [CO2_treatment]	CO2_to_FA_elec [CO2_treatment]	CO2_to_FA_hydro [CO2_treatment]	CO2_to_FT [CO2_treatment]	CO2_to_MeOH [CO2_treatment]	CO2_to_Polyols [CO2_treatment]
Electricity	1.31755	89.3626	11.4302	0	5.39716	1.52478	34.3842	108.058	6.31398	22.2932	10.8607	0.72885	Electricity	0.0151525	0.59809	0.203466	0	0.259358	0.0224806	0.762014	0.760703	0.117662	0.408865	0.123509	0.00108212
Thermal energy	0	0	0.40413	1.88773	0.02902	1.07898	0.31321	8.9459	2.29316	22.145	0	0.213487	Thermal energy	0	0	0.00719379	0.033401	0.00139454	0.015908	0.00694128	0.062977	0.0427335	0.406148	0	0.000316964
CO2 supply	-8.89896	-8.89896	-8.89896	-8.89896	-8.89896	-8.89896	-8.89896	-8.89896	-8.89896	-8.89896	-8.89896	-8.89896	CO2 supply	0.102343	0.0595594	0.158408	0.157456	0.427635	0.131202	0.197217	0.0626465	0.165834	0.16321	0.101199	0.0132123
H2 supply	76.6363	0	20.2707	0	0	55.3239	0	0	20.3375	0	60.7143	0	H2 supply	0.881359	0	0.360833	0	0	0.815669	0	0	0.378993	0	0.690446	0
Avoided products	-0.09961	-51.068	-15.1736	-30.9425	6.4037	-0.99981	-1.10156	15.9314	15.8183	-0.467398	7.46089	-367.242	Avoided products	0.00114557	0.34179	0.2701	0.547487	0.307727	0.0147407	0.0244125	0.112153	0.294777	0.00857225	0.0848456	0.545243
Misc	0	0.08365	0	-14.7881	-0.080859	0	0.42488	0.215976	0	0.719989	0	296.454	Misc	0	0.000559857	0	0.261656	0.00388564	0	0.00941609	0.00152042	0	0.0132049	0	0.440145
Emissions	0	0	0	0	0	0	0	0	0	0	0	0	Emissions	0	0	0	0	0	0	0	0	0	0	0	0
ecosystem quality freshwater eutrophication	CO2_to_CH4 [CO2_treatment]	CO2_to_CO_DRM [CO2_treatment]	CO2_to_CO_rWGS [CO2_treatment]	CO2_to_DMC [CO2_treatment]	CO2_to_DME [CO2_treatment]	CO2_to_DMM [CO2_treatment]	CO2_to_EtOH [CO2_treatment]	CO2_to_FA_elec_lp [CO2_treatment]	CO2_to_FA_hydro [CO2_treatment]	CO2_to_FT [CO2_treatment]	CO2_to_MeOH [CO2_treatment]	CO2_to_Polyols [CO2_treatment]	Rel (ABS)	CO2_to_CH4 [CO2_treatment]	CO2_to_CO_DRM [CO2_treatment]	CO2_to_CO_rWGS [CO2_treatment]	CO2_to_DMC [CO2_treatment]	CO2_to_DME [CO2_treatment]	CO2_to_DMM [CO2_treatment]	CO2_to_EtOH [CO2_treatment]	CO2_to_FA_elec [CO2_treatment]	CO2_to_FA_hydro [CO2_treatment]	CO2_to_FT [CO2_treatment]	CO2_to_MeOH [CO2_treatment]	CO2_to_Polyols [CO2_treatment]
Electricity	5.61407e-06	0.00038	4.87041e-05	0	2.29973e-05	6.49708e-06	0.000146511	0.000460436	2.6904e-05	9.4991e-05	4.6278e-05	3.106e-06	Electricity	0.0186718	0.287778	0.063224	0	0.264662	0.0104193	0.299951	0.100007	0.0089363	0.0220893	0.110595	0.000107029
Thermal energy	0	0	7.18506e-05	0.00034	3.38983e-06	0.00019	5.5685e-05	0.00159	0.0004077	0.00393715	0	3.7956e-05	Thermal energy	0	0	0.0932711	0.157622	0.0390115	0.304702	0.114003	0.345347	0.13542	0.91555	0	0.00130792
CO2 supply	-1.70635e-05	-1.70635e-05	-1.70635e-05	-1.70635e-05	-1.70635e-05	-1.70635e-05	-1.70635e-05	-1.70635e-05	-1.70635e-05	-1.70635e-05	-1.70635e-05	-1.70635e-05	CO2 supply	0.0567512	0.0129224	0.0221506	0.00791052	0.196373	0.0273646	0.0349339	0.00370619	0.00566773	0.00396797	0.0407783	0.000587988
H2 supply	-0.00027	0	-7.27235e-05	0	0	-0.0002	0	0	-7.29631e-05	0	-0.00022	0	H2 supply	0.897989	0	0.0944042	0	0	0.320739	0	0	0.0242351	0	0.525755	0
Avoided products	-7.99426e-06	-0.000916684	-0.00056	-0.00153	3.58212e-05	-0.00021	-0.000204726	-0.00250379	-0.00248601	-0.000141869	0.000135104	-0.0154722	Avoided products	0.026588	0.694215	0.72695	0.709298	0.412244	0.336776	0.419134	0.543822	0.825741	0.0329904	0.322871	0.533154
Misc	0	6.713e-06	0	-0.00027	-7.62131e-06	0	6.4465e-05	3.2769e-05	0	0.00010924	0	0.0134898	Misc	0	0.00508383	0	0.12517	0.087709	0	0.131979	0.00711742	0	0.0254028	0	0.464843
Emissions	0	0	0	0	0	0	0	0	0	0	0	0	Emissions	0	0	0	0	0	0	0	0	0	0	0	0
ecosystem quality ionising radiation	CO2_to_CH4 [CO2_treatment]	CO2_to_CO_DRM [CO2_treatment]	CO2_to_CO_rWGS [CO2_treatment]	CO2_to_DMC [CO2_treatment]	CO2_to_DME [CO2_treatment]	CO2_to_DMM [CO2_treatment]	CO2_to_EtOH [CO2_treatment]	CO2_to_FA_elec_lp [CO2_treatment]	CO2_to_FA_hydro [CO2_treatment]	CO2_to_FT [CO2_treatment]	CO2_to_MeOH [CO2_treatment]	CO2_to_Polyols [CO2_treatment]	Rel (ABS)	CO2_to_CH4 [CO2_treatment]	CO2_to_CO_DRM [CO2_treatment]	CO2_to_CO_rWGS [CO2_treatment]	CO2_to_DMC [CO2_treatment]	CO2_to_DME [CO2_treatment]	CO2_to_DMM [CO2_treatment]	CO2_to_EtOH [CO2_treatment]	CO2_to_FA_elec [CO2_treatment]	CO2_to_FA_hydro [CO2_treatment]	CO2_to_FT [CO2_treatment]	CO2_to_MeOH [CO2_treatment]	CO2_to_Polyols [CO2_treatment]
Electricity	1.37283e-09	9.3112e-08	1.19098e-08	0	5.62361e-09	1.58876e-09	3.58268e-08	1.13e-07	6.57889e-09	2.3e-08	1.1e-08	7.59431e-10	Electricity	0.00139029	0.0564732	0.00880103	0	0.0202492	0.00124139	0.189236	0.105213	0.00718167	0.0155283	0.0114264	7.00959e-05
Thermal energy	0	0	1.64821e-08	7.6989e-08	1.68434e-09	4.4005e-08	1.27739e-08	3.64848e-07	9.4e-08	9.03e-07	0	8.70682e-09	Thermal energy	0	0	0.0121798	0.0900629	0.00606487	0.0343836	0.0674712	0.339705	0.102613	0.609655	0	0.000803644
CO2 supply	-9.61658e-08	-9.61658e-08	-9.61658e-08	-9.61658e-08	-9.61658e-08	-9.61658e-08	-9.61658e-08	-9.61658e-08	-9.61658e-08	-9.61658e-08	-9.61658e-08	-9.61658e-08	CO2 supply	0.0973888	0.0583254	0.071064	0.112496	0.346268	0.0751398	0.507944	0.0895387	0.104977	0.0649257	0.0998935	0.00887616
H2 supply	-8.86748e-07	0	-2.3455e-07	0	0	-6.40146e-07	0	0	-2.35323e-07	0	-7.02517e-07	0	H2 supply	0.898025	0	0.173326	0	0	0.500183	0	0	0.256884	0	0.729749	0
Avoided products	-3.15543e-09	-1.45685e-06	-9.94121e-07	-3.78648e-07	1.71863e-07	-4.97919e-07	2.1884e-08	-4.88e-07	-4.84e-07	-4.21e-07	1.53e-07	-5.719e-06	Avoided products	0.00319556	0.883594	0.734629	0.442948	0.618834	0.389053	0.11559	0.45437	0.528345	0.284236	0.158931	0.527867
Misc	0	2.6497e-09	0	-3.03033e-07	2.38376e-09	0	2.26733e-08	1.2e-08	0	3.8e-08	0	5.00954e-06	Misc	0	0.00160707	0	0.354493	0.0085833	0	0.119759	0.011173	0	0.0256555	0	0.462383
Emissions	0	0	0	0	0	0	0	0	0	0	0	0	Emissions	0	0	0	0	0	0	0	0	0	0	0	0
ecosystem quality marine eutrophication	CO2_to_CH4 [CO2_treatment]	CO2_to_CO_DRM [CO2_treatment]	CO2_to_CO_rWGS [CO2_treatment]	CO2_to_DMC [CO2_treatment]	CO2_to_DME [CO2_treatment]	CO2_to_DMM [CO2_treatment]	CO2_to_EtOH [CO2_treatment]	CO2_to_FA_elec_lp [CO2_treatment]	CO2_to_FA_hydro [CO2_treatment]	CO2_to_FT [CO2_treatment]	CO2_to_MeOH [CO2_treatment]	CO2_to_Polyols [CO2_treatment]	Rel (ABS)	CO2_to_CH4 [CO2_treatment]	CO2_to_CO_DRM [CO2_treatment]	CO2_to_CO_rWGS [CO2_treatment]	CO2_to_DMC [CO2_treatment]	CO2_to_DME [CO2_treatment]	CO2_to_DMM [CO2_treatment]	CO2_to_EtOH [CO2_treatment]	CO2_to_FA_elec [CO2_treatment]	CO2_to_FA_hydro [CO2_treatment]	CO2_to_FT [CO2_treatment]	CO2_to_MeOH [CO2_treatment]	CO2_to_Polyols [CO2_treatment]
Electricity	7.301e-06	0.0005	6.33389e-05	0	2.99076e-05	8.44934e-06	0.00019	0.000598788	3.4988e-05	0.000123534	6.0183e-05	4.039e-06	Electricity	0.0226483	0.251365	0.0636407	0	0.0366155	0.0108189	0.236255	0.103898	0.0105027	0.0185022	0.122573	9.84807e-05
Thermal energy	0	0	0.00011	0.00051	7.27945e-06	0.00029	8.42162e-05	0.00241	0.000616588	0.00595438	0	5.7403e-05	Thermal energy	0	0	0.110524	0.143662	0.00891214	0.371328	0.104718	0.418168	0.185087	0.89181	0	0.00139963
CO2 supply	0.00012	0.00012	0.00012	0.00012	0.00012	0.00012	0.00012	0.00012	0.00012	0.00012	0.00012	0.00012	CO2 supply	0.37225	0.0603275	0.120572	0.0338028	0.146915	0.153653	0.149214	0.0208216	0.0360216	0.0179729	0.244401	0.00292589
H2 supply	-4.50632e-05	0	-1.19195e-05	0	0	-3.25313e-05	0	0	-1.19588e-05	0	-3.57009e-05	0	H2 supply	0.13979	0	0.0119763	0	0	0.0416544	0	0	0.00358979	0	0.0727112	0
Avoided products	-0.00015	-0.00124914	-0.00069	-0.00237	-0.00052	-0.00033	-0.00028	-0.00256602	-0.0025478	-0.000250718	-0.000275112	-0.0217957	Avoided products	0.465312	0.62798	0.693287	0.667606	0.63663	0.422546	0.348165	0.44524	0.764799	0.037551	0.560314	0.531434
Misc	0	0.00012	0	0.00055	-0.000139614	0	0.00013	6.8425e-05	0	0.000228103	0	0.0190359	Misc	0	0.0603275	0	0.15493	0.170928	0	0.161648	0.0118727	0	0.0341639	0	0.464142
Emissions	0	0	0	0	0	0	0	0	0	0	0	0	Emissions	0	0	0	0	0	0	0	0	0	0	0	0
ecosystem quality terrestrial eutrophication	CO2_to_CH4 [CO2_treatment]	CO2_to_CO_DRM [CO2_treatment]	CO2_to_CO_rWGS [CO2_treatment]	CO2_to_DMC [CO2_treatment]	CO2_to_DME [CO2_treatment]	CO2_to_DMM [CO2_treatment]	CO2_to_EtOH [CO2_treatment]	CO2_to_FA_elec_lp [CO2_treatment]	CO2_to_FA_hydro [CO2_treatment]	CO2_to_FT [CO2_treatment]	CO2_to_MeOH [CO2_treatment]	CO2_to_Polyols [CO2_treatment]	Rel (ABS)	CO2_to_CH4 [CO2_treatment]	CO2_to_CO_DRM [CO2_treatment]	CO2_to_CO_rWGS [CO2_treatment]	CO2_to_DMC [CO2_treatment]	CO2_to_DME [CO2_treatment]	CO2_to_DMM [CO2_treatment]	CO2_to_EtOH [CO2_treatment]	CO2_to_FA_elec [CO2_treatment]	CO2_to_FA_hydro [CO2_treatment]	CO2_to_FT [CO2_treatment]	CO2_to_MeOH [CO2_treatment]	CO2_to_Polyols [CO2_treatment]
Electricity	7.03453e-05	0.00477	0.00061	0	0.00029	8.14096e-05	0.00184	0.00576934	0.00033711	0.00119026	0.000579867	3.8914e-05	Electricity	0.0241708	0.249477	0.0649627	0	0.0367642	0.0109696	0.262108	0.106167	0.0111919	0.0177907	0.122813	0.000105047
Thermal energy	0	0	0.00111	0.00517	7.46713e-05	0.00295	0.00086	0.02449	0.00627813	0.0606278	0	0.000584477	Thermal energy	0	0	0.118211	0.150597	0.0094663	0.397499	0.122507	0.450662	0.20843	0.906198	0	0.00157777
CO2 supply	0.00045	0.00045	0.00045	0.00045	0.00045	0.00045	0.00045	0.00045	0.00045	0.00045	0.00045	0.00045	CO2 supply	0.154621	0.0235356	0.0479233	0.0131081	0.0570478	0.0606354	0.0641026	0.00828085	0.0149397	0.00672611	0.0953075	0.00121475
H2 supply	-0.0008	0	-0.00021	0	0	-0.00058	0	0	-0.00021	0	-0.00064	0	H2 supply	0.274881	0	0.0223642	0	0	0.0781523	0	0	0.00697188	0	0.135549	0
Avoided products	-0.00159	-0.01257	-0.00701	-0.02266	-0.00558	-0.00336	-0.00264	-0.0230092	-0.0228458	-0.00255604	-0.00305169	-0.197429	Avoided products	0.546327	0.657427	0.746539	0.660064	0.707393	0.452744	0.376068	0.423412	0.758466	0.0382049	0.646331	0.532949
Misc	0	0.00133	0	0.00605	0.00149344	0	0.00123	0.000623763	0	0.00207941	0	0.171943	Misc	0	0.0695607	0	0.176231	0.189328	0	0.175214	0.0114784	0	0.0310807	0	0.464153
Emissions	0	0	0	0	0	0	0	0	0	0	0	0	Emissions	0	0	0	0	0	0	0	0	0	0	0	0
human health carcinogenic effects	CO2_to_CH4 [CO2_treatment]	CO2_to_CO_DRM [CO2_treatment]	CO2_to_CO_rWGS [CO2_treatment]	CO2_to_DMC [CO2_treatment]	CO2_to_DME [CO2_treatment]	CO2_to_DMM [CO2_treatment]	CO2_to_EtOH [CO2_treatment]	CO2_to_FA_elec_lp [CO2_treatment]	CO2_to_FA_hydro [CO2_treatment]	CO2_to_FT [CO2_treatment]	CO2_to_MeOH [CO2_treatment]	CO2_to_Polyols [CO2_treatment]	Rel (ABS)	CO2_to_CH4 [CO2_treatment]	CO2_to_CO_DRM [CO2_treatment]	CO2_to_CO_rWGS [CO2_treatment]	CO2_to_DMC [CO2_treatment]	CO2_to_DME [CO2_treatment]	CO2_to_DMM [CO2_treatment]	CO2_to_EtOH [CO2_treatment]	CO2_to_FA_elec [CO2_treatment]	CO2_to_FA_hydro [CO2_treatment]	CO2_to_FT [CO2_treatment]	CO2_to_MeOH [CO2_treatment]	CO2_to_Polyols [CO2_treatment]
Electricity	9.5744e-10	6.49383e-08	8.30614e-09	0	3.92202e-09	1.10803e-09	2.49864e-08	7.9e-08	4.58826e-09	1.6e-08	7.89231e-09	5.29643e-10	Electricity	0.0555609	0.380388	0.111719	0	0.264883	0.0239376	0.488997	0.188473	0.0189099	0.0423789	0.296708	0.000169566
Thermal energy	0	0	6.17955e-09	2.88651e-08	3.29333e-10	1.64986e-08	4.78926e-09	1.36791e-07	3.5e-08	3.39e-07	0	3.26441e-09	Thermal energy	0	0	0.0831162	0.131871	0.0222423	0.356432	0.0937284	0.326346	0.144248	0.897904	0	0.00104511
CO2 supply	-3.44321e-09	-3.44321e-09	-3.44321e-09	-3.44321e-09	-3.44321e-09	-3.44321e-09	-3.44321e-09	-3.44321e-09	-3.44321e-09	-3.44321e-09	-3.44321e-09	-3.44321e-09	CO2 supply	0.199812	0.0201692	0.0463119	0.0157303	0.232545	0.0743863	0.0673855	0.00821456	0.0141908	0.00911997	0.129446	0.00110235
H2 supply	9.81947e-09	0	2.59731e-09	0	0	7.0887e-09	0	0	2.60586e-09	0	7.77938e-09	0	H2 supply	0.569831	0	0.0349344	0	0	0.153143	0	0	0.0107397	0	0.292462	0
Avoided products	-3.01214e-09	-9.98051e-08	-5.38221e-08	-1.71746e-07	-5.83388e-09	-1.81497e-08	-1.40914e-08	-1.98e-07	-1.97e-07	-1.26856e-08	7.48474e-09	-1.666e-06	Avoided products	0.174797	0.584626	0.723918	0.784623	0.394004	0.392102	0.275776	0.472374	0.811911	0.0336003	0.281385	0.533373
Misc	0	2.52938e-09	0	-1.48354e-08	1.27819e-09	0	3.78694e-09	1.925e-09	0	6.41726e-09	0	1.45028e-06	Misc	0	0.0148163	0	0.0677757	0.0863257	0	0.0741125	0.00459252	0	0.0169973	0	0.46431
Emissions	0	0	0	0	0	0	0	0	0	0	0	0	Emissions	0	0	0	0	0	0	0	0	0	0	0	0
human health ionising radiation	CO2_to_CH4 [CO2_treatment]	CO2_to_CO_DRM [CO2_treatment]	CO2_to_CO_rWGS [CO2_treatment]	CO2_to_DMC [CO2_treatment]	CO2_to_DME [CO2_treatment]	CO2_to_DMM [CO2_treatment]	CO2_to_EtOH [CO2_treatment]	CO2_to_FA_elec_lp [CO2_treatment]	CO2_to_FA_hydro [CO2_treatment]	CO2_to_FT [CO2_treatment]	CO2_to_MeOH [CO2_treatment]	CO2_to_Polyols [CO2_treatment]	Rel (ABS)	CO2_to_CH4 [CO2_treatment]	CO2_to_CO_DRM [CO2_treatment]	CO2_to_CO_rWGS [CO2_treatment]	CO2_to_DMC [CO2_treatment]	CO2_to_DME [CO2_treatment]	CO2_to_DMM [CO2_treatment]	CO2_to_EtOH [CO2_treatment]	CO2_to_FA_elec [CO2_treatment]	CO2_to_FA_hydro [CO2_treatment]	CO2_to_FT [CO2_treatment]	CO2_to_MeOH [CO2_treatment]	CO2_to_Polyols [CO2_treatment]
Electricity	0.00021	0.014	0.00179	0	0.00085	0.00024	0.00539	0.0169251	0.000988956	0.00349177	0.00170111	0.00011416	Electricity	0.000443543	0.0421408	0.00451371	0	0.00598654	0.000559388	0.0741607	0.129504	0.00521927	0.014799	0.00367499	2.59985e-05
Thermal energy	0	0	0.00216	0.01009	0.00026	0.00577	0.00167	0.04781	0.0122558	0.118354	0	0.00114098	Thermal energy	0	0	0.00544671	0.0293647	0.00183118	0.0134486	0.0229774	0.365824	0.0646809	0.501613	0	0.000259845
CO2 supply	-0.05008	-0.05008	-0.05008	-0.05008	-0.05008	-0.05008	-0.05008	-0.05008	-0.05008	-0.05008	-0.05008	-0.05008	CO2 supply	0.105775	0.150743	0.126283	0.145747	0.352713	0.116726	0.689048	0.383193	0.2643	0.212251	0.10819	0.0114051
H2 supply	-0.42275	0	-0.11182	0	0	-0.30518	0	0	-0.11219	0	-0.33492	0	H2 supply	0.892895	0	0.281968	0	0	0.711309	0	0	0.592089	0	0.723542	0
Avoided products	-0.00042	-0.26778	-0.23072	-0.13243	0.09066	-0.06777	0.01198	0.0140666	0.0139668	-0.0579887	0.0761881	-2.31045	Avoided products	0.000887087	0.806032	0.581789	0.385408	0.638517	0.157957	0.164832	0.107633	0.0737104	0.24577	0.164593	0.526175
Misc	0	0.00036	0	-0.15101	0.000135291	0	0.00356	0.00180957	0	0.00603248	0	2.02924	Misc	0	0.00108362	0	0.439481	0.000952854	0	0.0489818	0.0138462	0	0.0255671	0	0.462135
Emissions	0	0	0	0	0	0	0	0	0	0	0	0	Emissions	0	0	0	0	0	0	0	0	0	0	0	0
human health non-carcinogenic effects	CO2_to_CH4 [CO2_treatment]	CO2_to_CO_DRM [CO2_treatment]	CO2_to_CO_rWGS [CO2_treatment]	CO2_to_DMC [CO2_treatment]	CO2_to_DME [CO2_treatment]	CO2_to_DMM [CO2_treatment]	CO2_to_EtOH [CO2_treatment]	CO2_to_FA_elec_lp [CO2_treatment]	CO2_to_FA_hydro [CO2_treatment]	CO2_to_FT [CO2_treatment]	CO2_to_MeOH [CO2_treatment]	CO2_to_Polyols [CO2_treatment]	Rel (ABS)	CO2_to_CH4 [CO2_treatment]	CO2_to_CO_DRM [CO2_treatment]	CO2_to_CO_rWGS [CO2_treatment]	CO2_to_DMC [CO2_treatment]	CO2_to_DME [CO2_treatment]	CO2_to_DMM [CO2_treatment]	CO2_to_EtOH [CO2_treatment]	CO2_to_FA_elec [CO2_treatment]	CO2_to_FA_hydro [CO2_treatment]	CO2_to_FT [CO2_treatment]	CO2_to_MeOH [CO2_treatment]	CO2_to_Polyols [CO2_treatment]
Electricity	8.47815e-09	5.75029e-07	7.3551e-08	0	3.47296e-08	9.81164e-09	2.21255e-07	6.95e-07	4.1e-08	1.43e-07	7e-08	4.69e-09	Electricity	0.0239453	0.395491	0.11135	0	0.139417	0.0219643	0.496726	0.299595	0.0338736	0.0715691	0.165237	0.000216558
Thermal energy	0	0	3.06222e-08	1.43039e-07	1.78003e-09	8.17574e-08	2.37328e-08	6.77855e-07	1.74e-07	1.678e-06	0	1.6e-08	Thermal energy	0	0	0.0463596	0.0845313	0.00714569	0.183021	0.0532811	0.292204	0.143756	0.839811	0	0.000738792
CO2 supply	-1.02292e-07	-1.02292e-07	-1.02292e-07	-1.02292e-07	-1.02292e-07	-1.02292e-07	-1.02292e-07	-1.02292e-07	-1.02292e-07	-1.02292e-07	-1.02292e-07	-1.02292e-07	CO2 supply	0.288909	0.070354	0.154862	0.0604512	0.410637	0.22899	0.22965	0.0440952	0.0845122	0.0511954	0.241463	0.00472329
H2 supply	2.37733e-07	0	6.28819e-08	0	0	1.7162e-07	0	0	6.3089e-08	0	1.88342e-07	0	H2 supply	0.671442	0	0.0951983	0	0	0.384187	0	0	0.0521233	0	0.444587	0
Avoided products	-5.56027e-09	-7.71971e-07	-3.91189e-07	-1.32231e-06	-7.30873e-08	-8.12284e-08	-8.11267e-08	-8.36e-07	-8.3e-07	-4.57768e-08	6.3e-08	-1.1526e-05	Avoided products	0.0157042	0.530943	0.59223	0.781441	0.293399	0.181837	0.182133	0.360376	0.685734	0.0229105	0.148713	0.532208
Misc	0	4.66912e-09	0	-1.24502e-07	-3.72166e-08	0	1.70198e-08	8.65158e-09	0	2.9e-08	0	1.0008e-05	Misc	0	0.00321131	0	0.0735765	0.149401	0	0.0382101	0.00372945	0	0.014514	0	0.462114
Emissions	0	0	0	0	0	0	0	0	0	0	0	0	Emissions	0	0	0	0	0	0	0	0	0	0	0	0
human health ozone layer depletion	CO2_to_CH4 [CO2_treatment]	CO2_to_CO_DRM [CO2_treatment]	CO2_to_CO_rWGS [CO2_treatment]	CO2_to_DMC [CO2_treatment]	CO2_to_DME [CO2_treatment]	CO2_to_DMM [CO2_treatment]	CO2_to_EtOH [CO2_treatment]	CO2_to_FA_elec_lp [CO2_treatment]	CO2_to_FA_hydro [CO2_treatment]	CO2_to_FT [CO2_treatment]	CO2_to_MeOH [CO2_treatment]	CO2_to_Polyols [CO2_treatment]	Rel (ABS)	CO2_to_CH4 [CO2_treatment]	CO2_to_CO_DRM [CO2_treatment]	CO2_to_CO_rWGS [CO2_treatment]	CO2_to_DMC [CO2_treatment]	CO2_to_DME [CO2_treatment]	CO2_to_DMM [CO2_treatment]	CO2_to_EtOH [CO2_treatment]	CO2_to_FA_elec [CO2_treatment]	CO2_to_FA_hydro [CO2_treatment]	CO2_to_FT [CO2_treatment]	CO2_to_MeOH [CO2_treatment]	CO2_to_Polyols [CO2_treatment]
Electricity	2.18812e-09	1.48409e-07	1.89828e-08	0	8.96335e-09	2.53228e-09	5.71036e-08	1.79e-07	1e-08	3.7e-08	1.8e-08	1.21044e-09	Electricity	0.00681344	0.150718	0.0404553	0	0.0165981	0.00658833	0.308859	0.138435	0.0115834	0.0307515	0.0533606	4.52182e-05
Thermal energy	0	0	1.60469e-08	7.49561e-08	1.19433e-09	4.28431e-08	1.24366e-08	3.55214e-07	9.1e-08	8.79e-07	0	8.47692e-09	Thermal energy	0	0	0.0341984	0.101067	0.00221163	0.111467	0.0672665	0.274715	0.105409	0.730555	0	0.000316671
CO2 supply	9.11941e-08	9.11941e-08	9.11941e-08	9.11941e-08	9.11941e-08	9.11941e-08	9.11941e-08	9.11941e-08	9.11941e-08	9.11941e-08	9.11941e-08	9.11941e-08	CO2 supply	0.283963	0.092613	0.194349	0.122961	0.168871	0.237263	0.493246	0.0705277	0.105633	0.0757933	0.270343	0.00340672
H2 supply	5.31826e-08	0	1.40671e-08	0	0	3.83927e-08	0	0	1.41135e-08	0	4.21334e-08	0	H2 supply	0.165602	0	0.0299792	0	0	0.0998878	0	0	0.0163482	0	0.124904	0
Avoided products	-1.74583e-07	-5.98474e-07	-3.28938e-07	-2.06159e-07	-2.51988e-07	-2.09396e-07	-1.31001e-08	-6.62e-07	-6.57e-07	-1.77e-07	-1.86e-07	-1.4219e-05	Avoided products	0.543622	0.607786	0.701018	0.277973	0.466625	0.544794	0.0708552	0.511977	0.761027	0.147108	0.551393	0.531176
Misc	0	1.46602e-07	0	3.69342e-07	1.86682e-07	0	1.10511e-08	5.61754e-09	0	1.9e-08	0	1.2449e-05	Misc	0	0.148883	0	0.498	0.345694	0	0.0597727	0.0043445	0	0.0157913	0	0.465055
Emissions	0	0	0	0	0	0	0	0	0	0	0	0	Emissions	0	0	0	0	0	0	0	0	0	0	0	0
human health photochemical ozone creation	CO2_to_CH4 [CO2_treatment]	CO2_to_CO_DRM [CO2_treatment]	CO2_to_CO_rWGS [CO2_treatment]	CO2_to_DMC [CO2_treatment]	CO2_to_DME [CO2_treatment]	CO2_to_DMM [CO2_treatment]	CO2_to_EtOH [CO2_treatment]	CO2_to_FA_elec_lp [CO2_treatment]	CO2_to_FA_hydro [CO2_treatment]	CO2_to_FT [CO2_treatment]	CO2_to_MeOH [CO2_treatment]	CO2_to_Polyols [CO2_treatment]	Rel (ABS)	CO2_to_CH4 [CO2_treatment]	CO2_to_CO_DRM [CO2_treatment]	CO2_to_CO_rWGS [CO2_treatment]	CO2_to_DMC [CO2_treatment]	CO2_to_DME [CO2_treatment]	CO2_to_DMM [CO2_treatment]	CO2_to_EtOH [CO2_treatment]	CO2_to_FA_elec [CO2_treatment]	CO2_to_FA_hydro [CO2_treatment]	CO2_to_FT [CO2_treatment]	CO2_to_MeOH [CO2_treatment]	CO2_to_Polyols [CO2_treatment]
Electricity	2.4031e-05	0.00163	0.00021	0	9.84397e-05	2.78107e-05	0.00063	0.00197089	0.000115162	0.000406609	0.000198091	1.3294e-05	Electricity	0.0148888	0.23308	0.0625822	0	0.0227898	0.00983471	0.182609	0.114035	0.0115124	0.0202972	0.0765815	8.62519e-05
Thermal energy	0	0	0.00032	0.0015	2.33257e-05	0.00086	0.00025	0.00711	0.00182136	0.0175889	0	0.000169564	Thermal energy	0	0	0.0953633	0.0891795	0.00540013	0.304122	0.0724638	0.411381	0.182077	0.878005	0	0.00110014
CO2 supply	0.00045	0.00045	0.00045	0.00045	0.00045	0.00045	0.00045	0.00045	0.00045	0.00045	0.00045	0.00045	CO2 supply	0.278805	0.0643472	0.134105	0.0267539	0.104179	0.159134	0.130435	0.0260368	0.0449853	0.0224632	0.173969	0.00291962
H2 supply	0.00036	0	9.5589e-05	0	0	0.00026	0	0	9.59038e-05	0	0.00029	0	H2 supply	0.223044	0	0.0284865	0	0	0.0919439	0	0	0.00958724	0	0.112113	0
Avoided products	-0.00078	-0.00426331	-0.00228	-0.0116	-0.00295	-0.00123	-0.00177	-0.00757463	-0.00752085	-0.000994821	-0.00164858	-0.0818626	Avoided products	0.483262	0.609627	0.679463	0.689655	0.682954	0.434965	0.513043	0.438265	0.751839	0.0496597	0.637336	0.531128
Misc	0	0.00065	0	0.00327	0.000797705	0	0.00035	0.000177721	0	0.000592459	0	0.0716344	Misc	0	0.092946	0	0.194411	0.184677	0	0.101449	0.0102829	0	0.0295745	0	0.464766
Emissions	0	0	0	0	0	0	0	0	0	0	0	0	Emissions	0	0	0	0	0	0	0	0	0	0	0	0
human health respiratory effects, inorganics	CO2_to_CH4 [CO2_treatment]	CO2_to_CO_DRM [CO2_treatment]	CO2_to_CO_rWGS [CO2_treatment]	CO2_to_DMC [CO2_treatment]	CO2_to_DME [CO2_treatment]	CO2_to_DMM [CO2_treatment]	CO2_to_EtOH [CO2_treatment]	CO2_to_FA_elec_lp [CO2_treatment]	CO2_to_FA_hydro [CO2_treatment]	CO2_to_FT [CO2_treatment]	CO2_to_MeOH [CO2_treatment]	CO2_to_Polyols [CO2_treatment]	Rel (ABS)	CO2_to_CH4 [CO2_treatment]	CO2_to_CO_DRM [CO2_treatment]	CO2_to_CO_rWGS [CO2_treatment]	CO2_to_DMC [CO2_treatment]	CO2_to_DME [CO2_treatment]	CO2_to_DMM [CO2_treatment]	CO2_to_EtOH [CO2_treatment]	CO2_to_FA_elec [CO2_treatment]	CO2_to_FA_hydro [CO2_treatment]	CO2_to_FT [CO2_treatment]	CO2_to_MeOH [CO2_treatment]	CO2_to_Polyols [CO2_treatment]
Electricity	4.50388e-06	0.00031	3.90728e-05	0	1.84495e-05	5.21227e-06	0.000117538	0.000369383	2.1584e-05	7.6207e-05	3.7126e-05	2.491e-06	Electricity	0.0082356	0.248153	0.0473162	0	0.152819	0.006763	0.303219	0.117586	0.0125902	0.017909	0.0665563	6.64257e-05
Thermal energy	0	0	7.12168e-05	0.00033	7.16543e-06	0.00019	5.5194e-05	0.00158	0.000404103	0.00390242	0	3.7621e-05	Thermal energy	0	0	0.0862418	0.132238	0.0593518	0.246528	0.142387	0.502962	0.235719	0.917089	0	0.00100321
CO2 supply	-5.4914e-06	-5.4914e-06	-5.4914e-06	-5.4914e-06	-5.4914e-06	-5.4914e-06	-5.4914e-06	-5.4914e-06	-5.4914e-06	-5.4914e-06	-5.4914e-06	-5.4914e-06	CO2 supply	0.0100413	0.00439584	0.00664995	0.00220053	0.0454857	0.00712518	0.0141664	0.00174808	0.00320321	0.00129051	0.00984451	0.000146435
H2 supply	-0.00049	0	-0.00013	0	0	-0.00035	0	0	-0.00013	0	-0.00039	0	H2 supply	0.895993	0	0.157427	0	0	0.45413	0	0	0.0758307	0	0.699159	0
Avoided products	-4.68842e-05	-0.000894366	-0.00058	-0.00191	4.57085e-05	-0.00022	-0.000160028	-0.00116141	-0.00115317	-0.000187421	0.000125196	-0.0199916	Avoided products	0.0857304	0.715935	0.702365	0.76538	0.378607	0.285453	0.412832	0.369713	0.672657	0.0440449	0.224441	0.533101
Misc	0	3.93699e-05	0	-0.00025	4.39132e-05	0	4.9383e-05	2.5103e-05	0	8.3684e-05	0	0.0174634	Misc	0	0.0315154	0	0.100181	0.363737	0	0.127396	0.00799105	0	0.0196662	0	0.465683
Emissions	0	0	0	0	0	0	0	0	0	0	0	0	Emissions	0	0	0	0	0	0	0	0	0	0	0	0
resources land use	CO2_to_CH4 [CO2_treatment]	CO2_to_CO_DRM [CO2_treatment]	CO2_to_CO_rWGS [CO2_treatment]	CO2_to_DMC [CO2_treatment]	CO2_to_DME [CO2_treatment]	CO2_to_DMM [CO2_treatment]	CO2_to_EtOH [CO2_treatment]	CO2_to_FA_elec_lp [CO2_treatment]	CO2_to_FA_hydro [CO2_treatment]	CO2_to_FT [CO2_treatment]	CO2_to_MeOH [CO2_treatment]	CO2_to_Polyols [CO2_treatment]	Rel (ABS)	CO2_to_CH4 [CO2_treatment]	CO2_to_CO_DRM [CO2_treatment]	CO2_to_CO_rWGS [CO2_treatment]	CO2_to_DMC [CO2_treatment]	CO2_to_DME [CO2_treatment]	CO2_to_DMM [CO2_treatment]	CO2_to_EtOH [CO2_treatment]	CO2_to_FA_elec [CO2_treatment]	CO2_to_FA_hydro [CO2_treatment]	CO2_to_FT [CO2_treatment]	CO2_to_MeOH [CO2_treatment]	CO2_to_Polyols [CO2_treatment]
Electricity	0.01991	1.35014	0.17269	0	0.08154	0.02304	0.519495	1.6326	0.0953951	0.336818	0.16409	0.0110119	Electricity	0.0137845	0.12092	0.027409	0	0.0373148	0.00470815	0.28285	0.118207	0.0116176	0.0193258	0.0873518	0.000234444
Thermal energy	0	0	0.24382	1.13892	0.01669	0.65098	0.188968	5.3973	1.38352	13.3607	0	0.128802	Thermal energy	0	0	0.0386986	0.190883	0.00763778	0.133026	0.102888	0.390788	0.168491	0.766602	0	0.00274221
CO2 supply	-0.67068	-0.67068	-0.67068	-0.67068	-0.67068	-0.67068	-0.67068	-0.67068	-0.67068	-0.67068	-0.67068	-0.67068	CO2 supply	0.464338	0.0600668	0.106449	0.112406	0.306921	0.137051	0.365166	0.0485601	0.081678	0.0384819	0.35703	0.0142788
H2 supply	-0.42639	0	-0.11278	0	0	-0.30781	0	0	-0.11315	0	-0.3378	0	H2 supply	0.295206	0	0.0179002	0	0	0.0629	0	0	0.0137798	0	0.179824	0
Avoided products	-0.3274	-8.86981	-5.10051	-2.75778	-1.12648	-3.24113	-0.222051	-5.99106	-5.94852	-2.66128	-0.705928	-24.7556	Avoided products	0.226672	0.79439	0.809543	0.462204	0.515507	0.662315	0.120901	0.433779	0.724434	0.152697	0.375794	1
Misc	0	0.27493	0	1.39921	0.2898	0	0.23545	0.119685	0	0.398988	0	21.4041	Misc	0	0.024623	0	0.234507	0.13262	0	0.128196	0.00866572	0	0.0228929	0	0.455696
Emissions	0	0	0	0	0	0	0	0	0	0	0	0	Emissions	0	0	0	0	0	0	0	0	0	0	0	0
resources mineral, fossils and renewables	CO2_to_CH4 [CO2_treatment]	CO2_to_CO_DRM [CO2_treatment]	CO2_to_CO_rWGS [CO2_treatment]	CO2_to_DMC [CO2_treatment]	CO2_to_DME [CO2_treatment]	CO2_to_DMM [CO2_treatment]	CO2_to_EtOH [CO2_treatment]	CO2_to_FA_elec_lp [CO2_treatment]	CO2_to_FA_hydro [CO2_treatment]	CO2_to_FT [CO2_treatment]	CO2_to_MeOH [CO2_treatment]	CO2_to_Polyols [CO2_treatment]	Rel (ABS)	CO2_to_CH4 [CO2_treatment]	CO2_to_CO_DRM [CO2_treatment]	CO2_to_CO_rWGS [CO2_treatment]	CO2_to_DMC [CO2_treatment]	CO2_to_DME [CO2_treatment]	CO2_to_DMM [CO2_treatment]	CO2_to_EtOH [CO2_treatment]	CO2_to_FA_elec [CO2_treatment]	CO2_to_FA_hydro [CO2_treatment]	CO2_to_FT [CO2_treatment]	CO2_to_MeOH [CO2_treatment]	CO2_to_Polyols [CO2_treatment]
Electricity	-7.58588e-08	-5.14512e-06	-6.58103e-07	0	-3.10745e-07	-8.77903e-08	-1.97969e-06	-6.222e-06	-3.64e-07	-1.284e-06	-6.25e-07	-4.2e-08	Electricity	0.00790095	0.0781419	0.0166976	0	0.00527622	0.0196209	0.110677	0.0593067	0.00374723	0.0841569	0.0204335	1.4744e-05
Thermal energy	0	0	1.66742e-07	7.78861e-07	1.10922e-08	4.45179e-07	1.29227e-07	3.69101e-06	9.46e-07	9.137e-06	0	8.8e-08	Thermal energy	0	0	0.00423063	0.00292107	0.000188337	0.0994962	0.00722457	0.0351819	0.00973869	0.598864	0	3.08921e-05
CO2 supply	8.72208e-07	8.72208e-07	8.72208e-07	8.72208e-07	8.72208e-07	8.72208e-07	8.72208e-07	8.72208e-07	8.72208e-07	8.72208e-07	8.72208e-07	8.72208e-07	CO2 supply	0.0908434	0.0132467	0.0221299	0.00327117	0.0148094	0.194936	0.0487617	0.00831369	0.00897903	0.0571669	0.0285156	0.000306186
H2 supply	-8.07187e-06	0	-2.13506e-06	0	0	-3.27644e-08	0	0	-2.1421e-06	0	-6.39487e-06	0	H2 supply	0.840712	0	0.0541714	0	0	0.00732275	0	0	0.0220521	0	0.209071	0
Avoided products	-5.81294e-07	-5.93378e-05	-3.55809e-05	-0.00022	-5.73271e-05	-3.03639e-06	-1.36277e-05	-9.3477e-05	-9.2814e-05	-1.798e-06	-2.2695e-05	-0.00150821	Avoided products	0.0605437	0.901198	0.90277	0.825097	0.973372	0.678624	0.761871	0.891002	0.955483	0.117846	0.74198	0.529454
Misc	0	4.88128e-07	0	4.49841e-05	3.74238e-07	0	1.27833e-06	6.5e-07	0	2.166e-06	0	0.0013394	Misc	0	0.00741348	0	0.16871	0.00635428	0	0.0714664	0.00619566	0	0.141966	0	0.470194
Emissions	0	0	0	0	0	0	0	0	0	0	0	0	Emissions	0	0	0	0	0	0	0	0	0	0	0	0

## Sheet: Ranking
Near term	CO2_to_CH4 [CO2_treatment]	CO2_to_CO_DRM [CO2_treatment]	CO2_to_CO_rWGS [CO2_treatment]	CO2_to_DMC [CO2_treatment]	CO2_to_DME [CO2_treatment]	CO2_to_DMM [CO2_treatment]	CO2_to_EtOH [CO2_treatment]	CO2_to_FA_elec [CO2_treatment]	CO2_to_FA_hydro [CO2_treatment]	CO2_to_FT [CO2_treatment]	CO2_to_MeOH [CO2_treatment]	CO2_to_Polyols [CO2_treatment]
ILCD 1.0.8 2016 midpoint climate change GWP 100a	8	6	5	3	7	10	9	11	1	12	4	2
ILCD 1.0.8 2016 midpoint ecosystem quality freshwater and terrestrial acidification	9	3	5	4	6	8	10	11	2	12	7	1
ILCD 1.0.8 2016 midpoint ecosystem quality freshwater ecotoxicity	4	11	3	2	6	5	9	12	8	10	7	1
ILCD 1.0.8 2016 midpoint ecosystem quality freshwater eutrophication	8	4	5	3	9	7	10	6	1	12	11	2
ILCD 1.0.8 2016 midpoint ecosystem quality ionising radiation	7	1	2	4	11	5	9	8	6	12	10	3
ILCD 1.0.8 2016 midpoint ecosystem quality marine eutrophication	8	4	6	3	5	9	10	11	2	12	7	1
ILCD 1.0.8 2016 midpoint ecosystem quality terrestrial eutrophication	8	4	5	3	6	9	10	11	2	12	7	1
ILCD 1.0.8 2016 midpoint human health carcinogenic effects	7	5	4	2	6	8	11	10	3	12	9	1
ILCD 1.0.8 2016 midpoint human health ionising radiation	6	1	4	3	12	5	7	11	8	9	10	2
ILCD 1.0.8 2016 midpoint human health non-carcinogenic effects	7	5	4	2	6	8	10	11	3	12	9	1
ILCD 1.0.8 2016 midpoint human health ozone layer depletion	5	4	3	11	9	7	10	8	2	12	6	1
ILCD 1.0.8 2016 midpoint human health photochemical ozone creation	9	4	6	2	5	10	8	11	3	12	7	1
ILCD 1.0.8 2016 midpoint human health respiratory effects, inorganics	7	3	5	2	9	6	8	11	4	12	10	1
ILCD 1.0.8 2016 midpoint resources land use	8	1	2	9	6	5	10	11	3	12	7	4
ILCD 1.0.8 2016 midpoint resources mineral, fossils and renewables	11	5	7	1	6	10	9	3	4	12	8	2
Average	7.46667	4.06667	4.4	3.6	7.26667	7.46667	9.33333	9.73333	3.46667	11.6667	7.93333	1.6
Long term	CO2_to_CH4 [CO2_treatment]	CO2_to_CO_DRM [CO2_treatment]	CO2_to_CO_rWGS [CO2_treatment]	CO2_to_DMC [CO2_treatment]	CO2_to_DME [CO2_treatment]	CO2_to_DMM [CO2_treatment]	CO2_to_EtOH [CO2_treatment]	CO2_to_FA_elec [CO2_treatment]	CO2_to_FA_hydro [CO2_treatment]	CO2_to_FT [CO2_treatment]	CO2_to_MeOH [CO2_treatment]	CO2_to_Polyols [CO2_treatment]
ILCD 1.0.8 2016 midpoint climate change GWP 100a	8	6	5	3	7	10	9	11	1	12	4	2
ILCD 1.0.8 2016 midpoint ecosystem quality freshwater and terrestrial acidification	6	3	5	4	9	8	10	11	2	12	7	1
ILCD 1.0.8 2016 midpoint ecosystem quality freshwater ecotoxicity	10	6	4	2	3	9	5	12	8	7	11	1
ILCD 1.0.8 2016 midpoint ecosystem quality freshwater eutrophication	7	4	5	3	10	8	11	6	1	12	9	2
ILCD 1.0.8 2016 midpoint ecosystem quality ionising radiation	4	1	2	7	11	3	10	9	6	12	8	5
ILCD 1.0.8 2016 midpoint ecosystem quality marine eutrophication	8	4	6	3	4	9	10	11	2	12	7	1
ILCD 1.0.8 2016 midpoint ecosystem quality terrestrial eutrophication	8	4	5	3	6	9	10	11	2	12	7	1
ILCD 1.0.8 2016 midpoint human health carcinogenic effects	8	5	4	2	6	7	10	9	3	12	11	1
ILCD 1.0.8 2016 midpoint human health ionising radiation	1	7	3	5	12	2	9	11	8	10	6	4
ILCD 1.0.8 2016 midpoint human health non-carcinogenic effects	9	5	4	2	6	8	7	11	3	12	10	1
ILCD 1.0.8 2016 midpoint human health ozone layer depletion	8	3	4	11	9	6	10	7	2	12	5	1
ILCD 1.0.8 2016 midpoint human health photochemical ozone creation	9	5	6	2	4	10	8	11	3	12	7	1
ILCD 1.0.8 2016 midpoint human health respiratory effects, inorganics	6	5	4	2	10	7	9	11	3	12	8	1
ILCD 1.0.8 2016 midpoint resources land use	8	1	2	9	7	5	10	11	3	12	6	4
ILCD 1.0.8 2016 midpoint resources mineral, fossils and renewables	10	5	7	1	6	11	9	3	4	12	8	1
Average	7.33333	4.26667	4.4	3.93333	7.33333	7.46667	9.13333	9.66667	3.4	11.5333	7.6	1.8
Difference	CO2_to_CH4 [CO2_treatment]	CO2_to_CO_DRM [CO2_treatment]	CO2_to_CO_rWGS [CO2_treatment]	CO2_to_DMC [CO2_treatment]	CO2_to_DME [CO2_treatment]	CO2_to_DMM [CO2_treatment]	CO2_to_EtOH [CO2_treatment]	CO2_to_FA_elec [CO2_treatment]	CO2_to_FA_hydro [CO2_treatment]	CO2_to_FT [CO2_treatment]	CO2_to_MeOH [CO2_treatment]	CO2_to_Polyols [CO2_treatment]
ILCD 1.0.8 2016 midpoint climate change GWP 100a	0	0	0	0	0	0	0	0	0	0	0	0
ILCD 1.0.8 2016 midpoint ecosystem quality freshwater and terrestrial acidification	3	0	0	0	-3	0	0	0	0	0	0	0
ILCD 1.0.8 2016 midpoint ecosystem quality freshwater ecotoxicity	-6	5	-1	0	3	-4	4	0	0	3	-4	0
ILCD 1.0.8 2016 midpoint ecosystem quality freshwater eutrophication	1	0	0	0	-1	-1	-1	0	0	0	2	0
ILCD 1.0.8 2016 midpoint ecosystem quality ionising radiation	3	0	0	-3	0	2	-1	-1	0	0	2	-2
ILCD 1.0.8 2016 midpoint ecosystem quality marine eutrophication	0	0	0	0	1	0	0	0	0	0	0	0
ILCD 1.0.8 2016 midpoint ecosystem quality terrestrial eutrophication	0	0	0	0	0	0	0	0	0	0	0	0
ILCD 1.0.8 2016 midpoint human health carcinogenic effects	-1	0	0	0	0	1	1	1	0	0	-2	0
ILCD 1.0.8 2016 midpoint human health ionising radiation	5	-6	1	-2	0	3	-2	0	0	-1	4	-2
ILCD 1.0.8 2016 midpoint human health non-carcinogenic effects	-2	0	0	0	0	0	3	0	0	0	-1	0
ILCD 1.0.8 2016 midpoint human health ozone layer depletion	-3	1	-1	0	0	1	0	1	0	0	1	0
ILCD 1.0.8 2016 midpoint human health photochemical ozone creation	0	-1	0	0	1	0	0	0	0	0	0	0
ILCD 1.0.8 2016 midpoint human health respiratory effects, inorganics	1	-2	1	0	-1	-1	-1	0	1	0	2	0
ILCD 1.0.8 2016 midpoint resources land use	0	0	0	0	-1	0	0	0	0	0	1	0
ILCD 1.0.8 2016 midpoint resources mineral, fossils and renewables	1	0	0	0	0	-1	0	0	0	0	0	1
